# Supplementary material for: Single-trait and multi-trait genome-wide association analyses identify novel loci for blood pressure in African-ancestry populations
Source: PubMed Central journal article supplement (PMC5446189; doi:10.1371/journal.pgen.1006728), 2017-05-12

**S1 Fig.** Quantile-quantile plots for both individual traits and CASSOC analysis in discovery stage. **A.** SBP. **B.** DBP. **C.** PP. **D.** HTN. **E.**  $S_{Hom}$  in CPASSOC. **F.**  $S_{Het}$  in CPASSOC

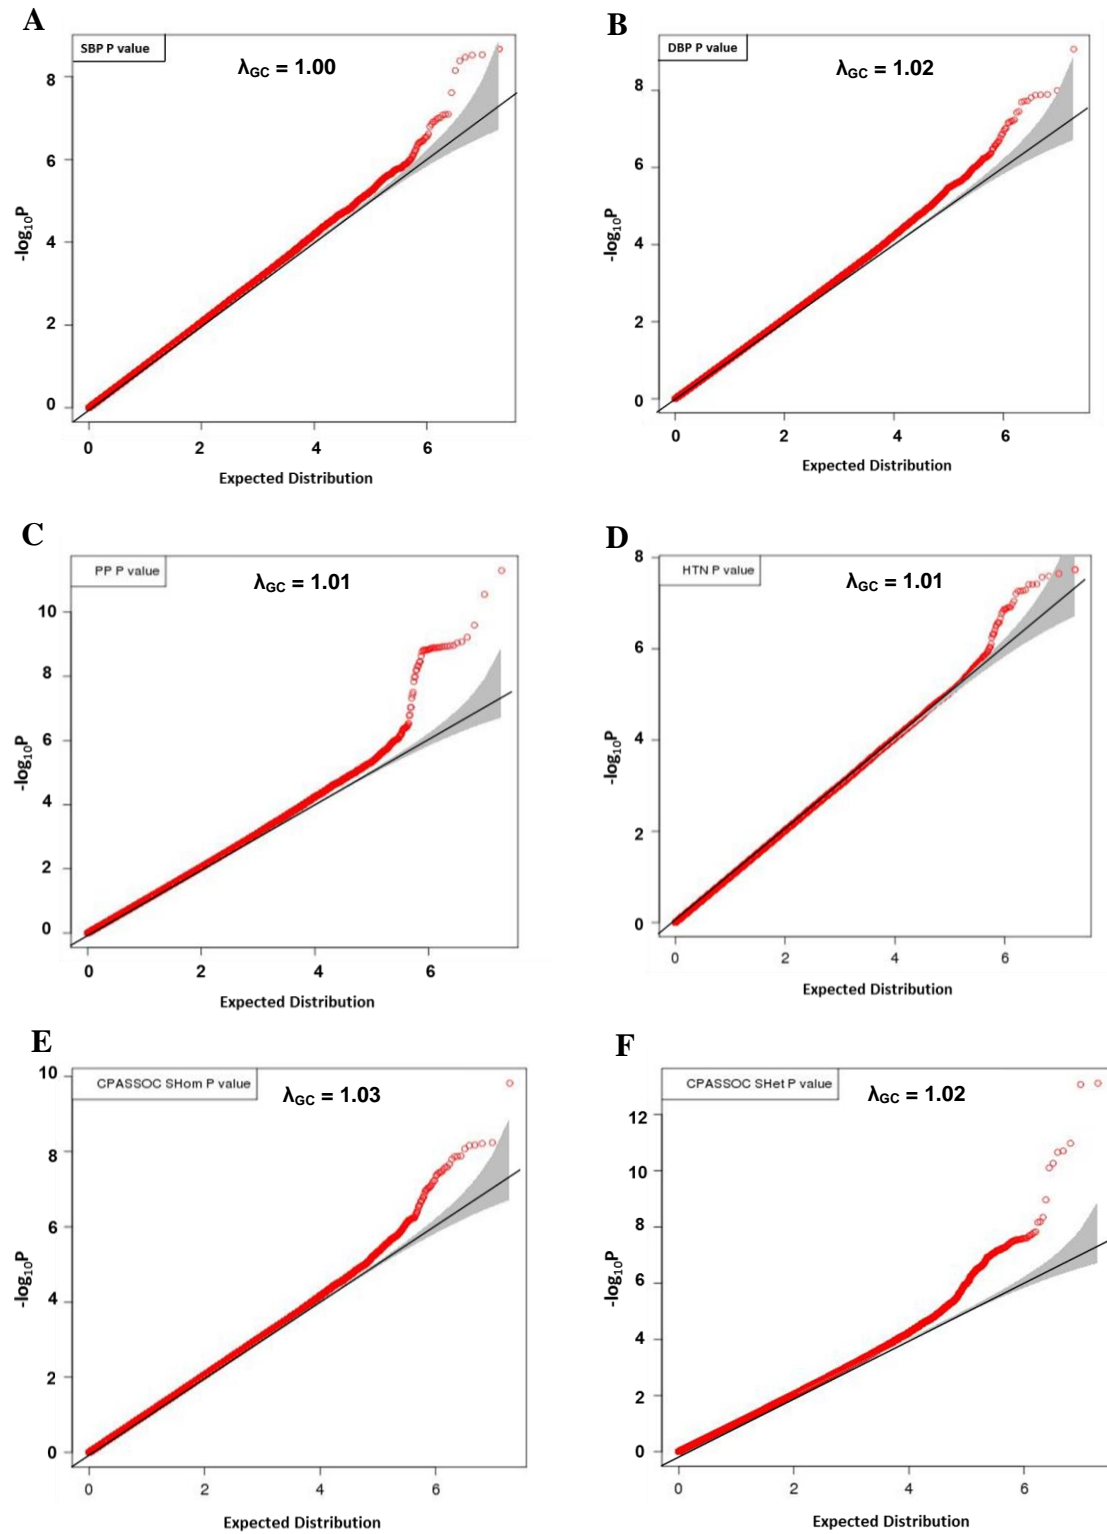

Supplement: pgen.1006728.s001.pdf [file pgen.1006728.s001.pdf]
