# Supplementary material for: Single-trait and multi-trait genome-wide association analyses identify novel loci for blood pressure in African-ancestry populations
Source: PubMed Central journal article supplement (PMC5446189; doi:10.1371/journal.pgen.1006728), 2017-05-12

**S2 Fig.** Manhattan plots of single trait and CPASSOC analyses at the discovery stage. **A.** SBP. **B.** DBP. **C.** PP. **D.** HTN. **E.**  $S_{Hom}$  in CPASSOC. **F.**  $S_{Het}$  in CPASSOC. The red line is genome-wide significance cutoff of  $P = 5.0 \times 10^{-8}$ . Loci that replicated in the combined discovery and replication trans-ethnic meta-analyses at the experimental-wide significance threshold ( $P < 1.25 \times 10^{-8}$ ) are highlighted using asterix.

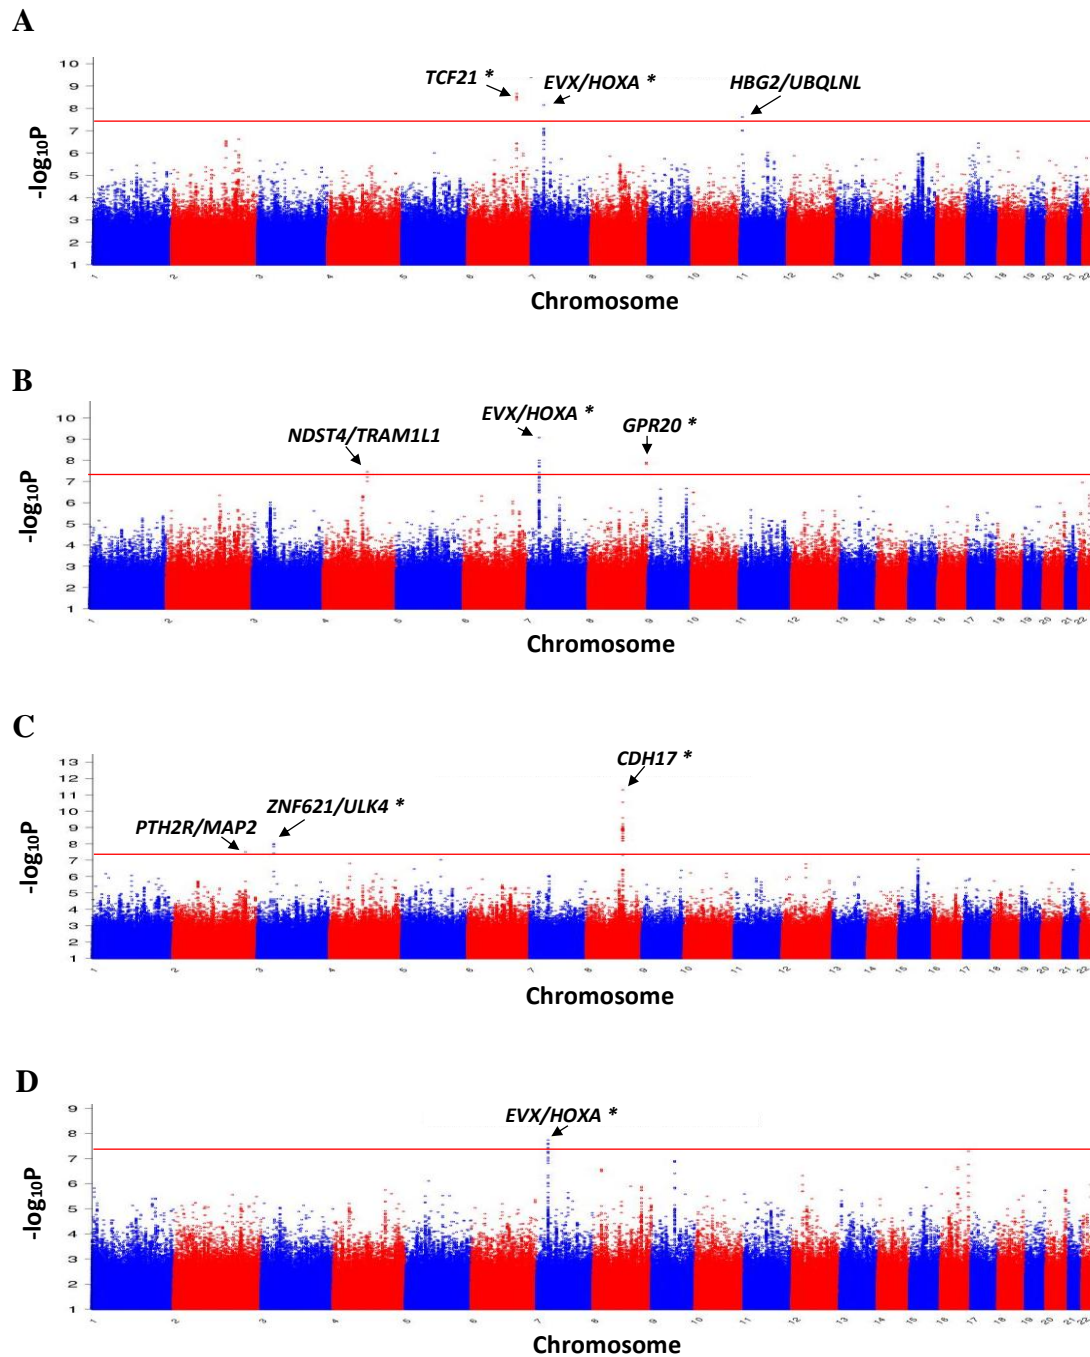

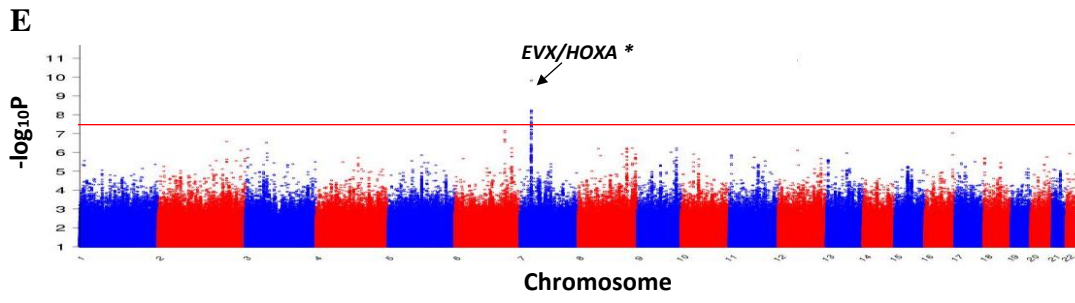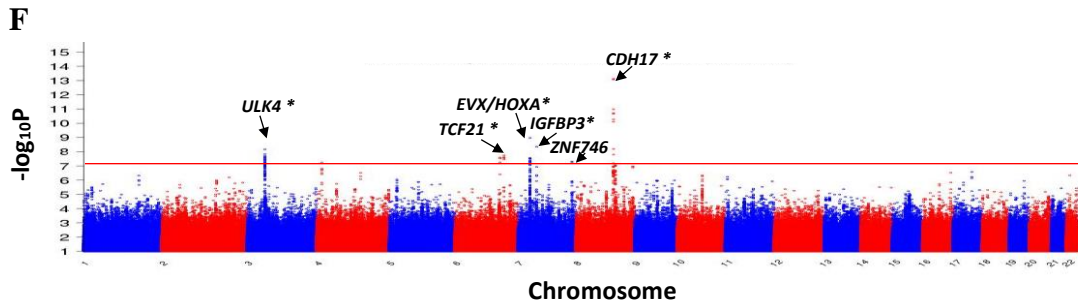

Supplement: pgen.1006728.s002.pdf [file pgen.1006728.s002.pdf]
