# Supplementary material for: Single-trait and multi-trait genome-wide association analyses identify novel loci for blood pressure in African-ancestry populations
Source: PubMed Central journal article supplement (PMC5446189; doi:10.1371/journal.pgen.1006728), 2017-05-12

**S3 Fig.** Regional Interrogation of the **A.** *HOXA/EVX1* locus for SBP **B.** *HOXA/EVX1* locus for DBP **C.** *HOXA/EVX1* locus for  $S_{\text{Het}}$  of CPASSOC **D.** *GPR20* for DBP **E.** *GPR20* for  $S_{\text{Het}}$  of CPASSOC **F.** *ULK4* for DBP **G.** *ULK4* for  $S_{\text{Het}}$  of CPASSOC **H.** *PLEKHG1* for SBP. The y axis shows the  $-\log_{10}$  P values of SNPs, and the x axis shows their chromosomal positions. The lowest P value SNP is plotted as a purple diamond and its correlation with other SNPs in the region is shown in color. The orange triangle is P value in the combined discovery and replication trans-ethnic meta-analysis of the lowest P value SNP.

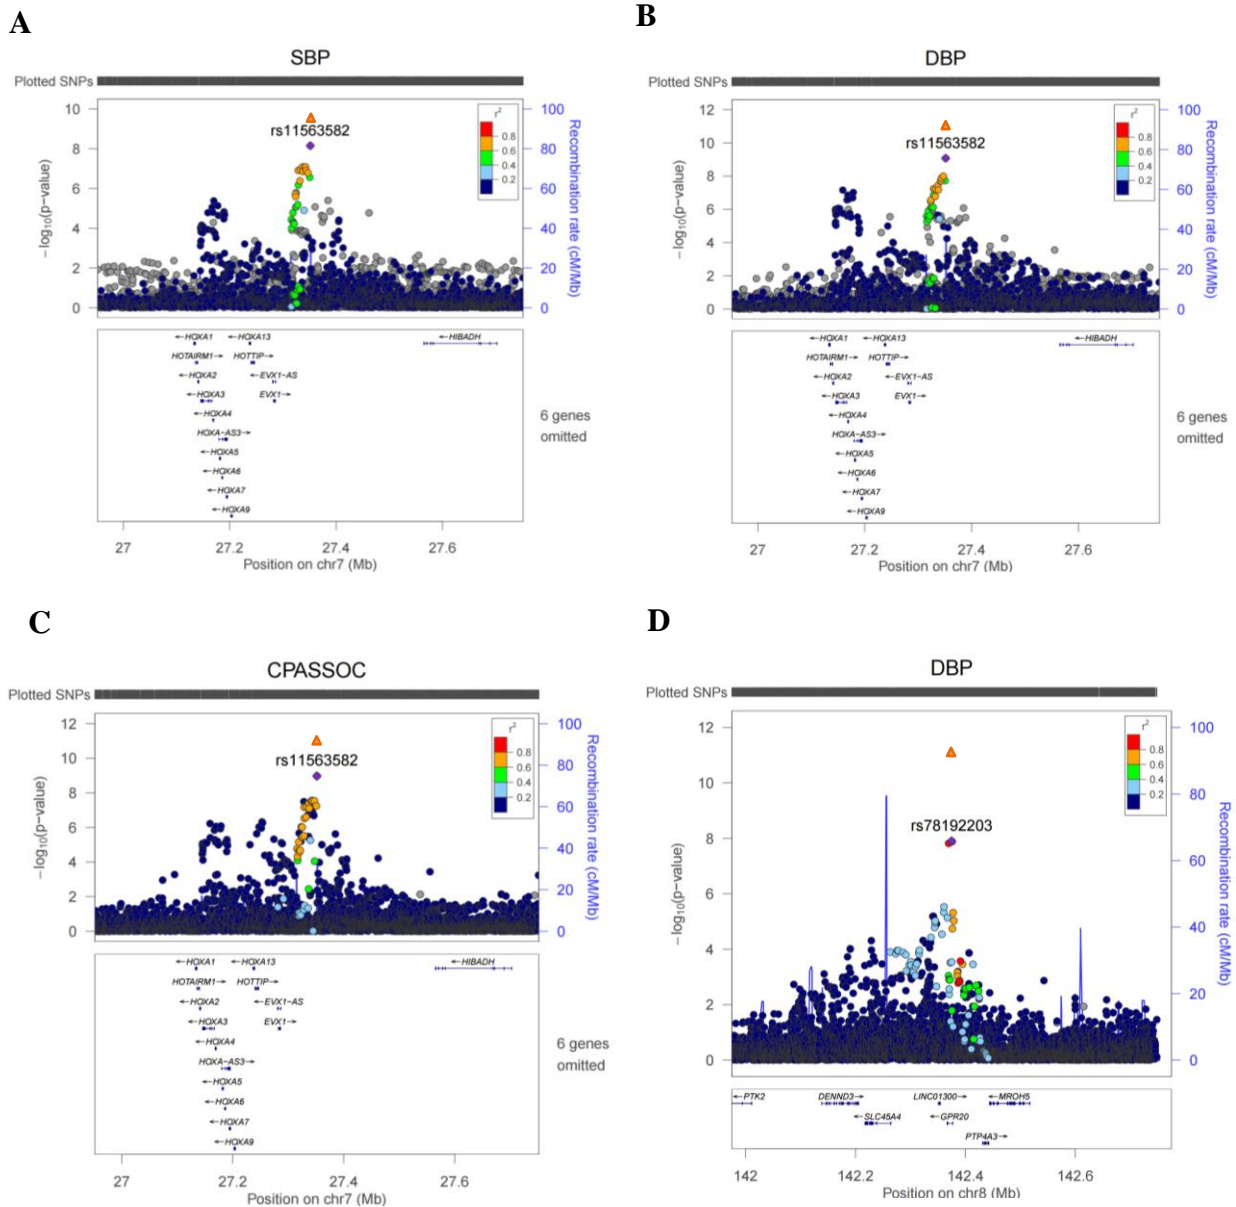

**E**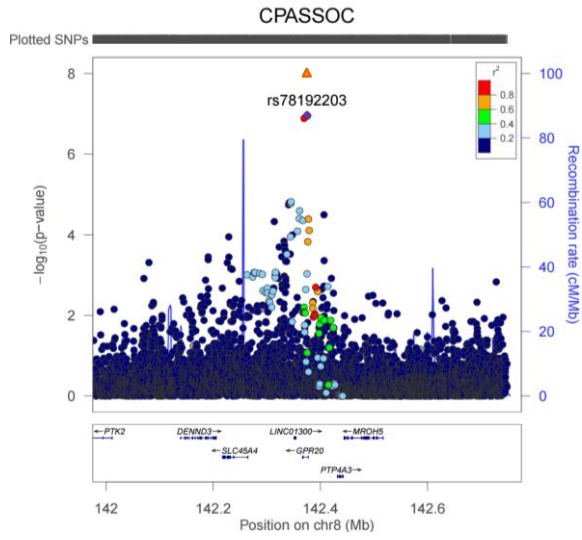**F**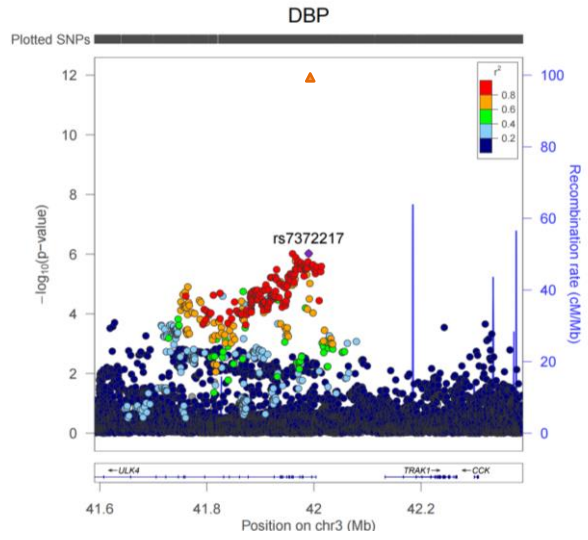**G**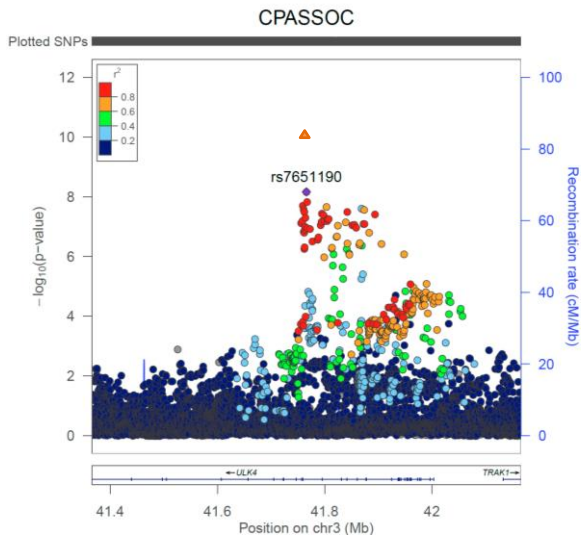**H**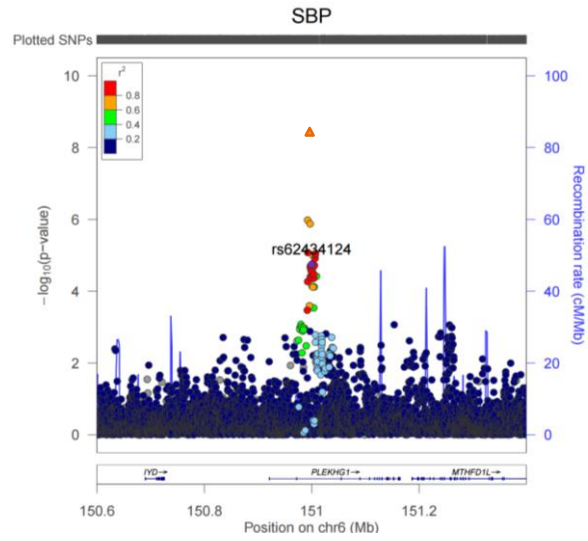

Supplement: pgen.1006728.s003.pdf [file pgen.1006728.s003.pdf]
