# Supplementary material for: Single-trait and multi-trait genome-wide association analyses identify novel loci for blood pressure in African-ancestry populations
Source: PubMed Central journal article supplement (PMC5446189; doi:10.1371/journal.pgen.1006728), 2017-05-12

**S4 Fig.** Discovery stage results and linkage disequilibrium maps of the candidate regions. P value plots, genomic structures and LD maps of chromosomes 6q23 (A), p15 (B), 8q24 (C), 8q22 (D), 3p22 (E), 6q26 (F), 9q21 (G), 7p21 (H), 12q14 (I). The red plots represent the  $-\log_{10}$  of the P values for association results. The LD maps based on  $D'$  (above) and  $r^2$  (below) were drawn using the genotype data of 7717 CARE cohorts. Black triangles indicate the LD blocks identified by Haploview using Gabriel's method. Red dot lines indicate positions of marker SNPs.

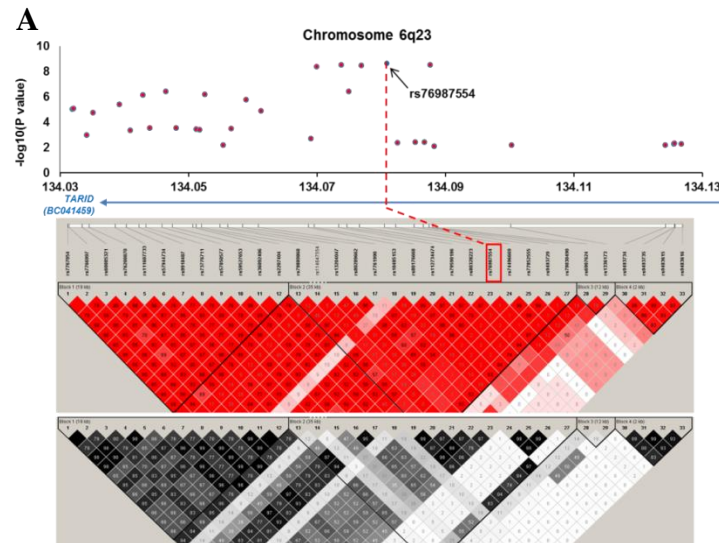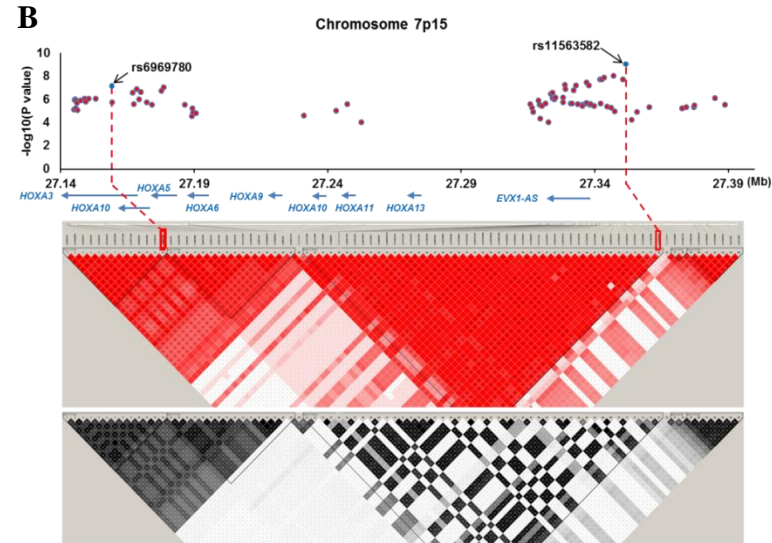

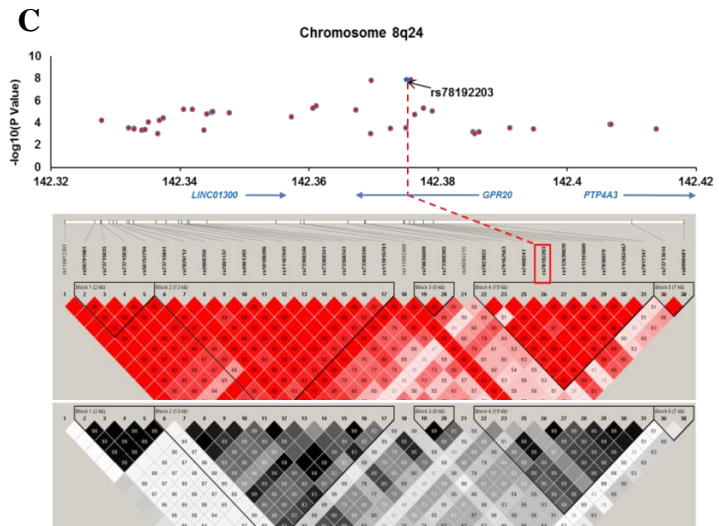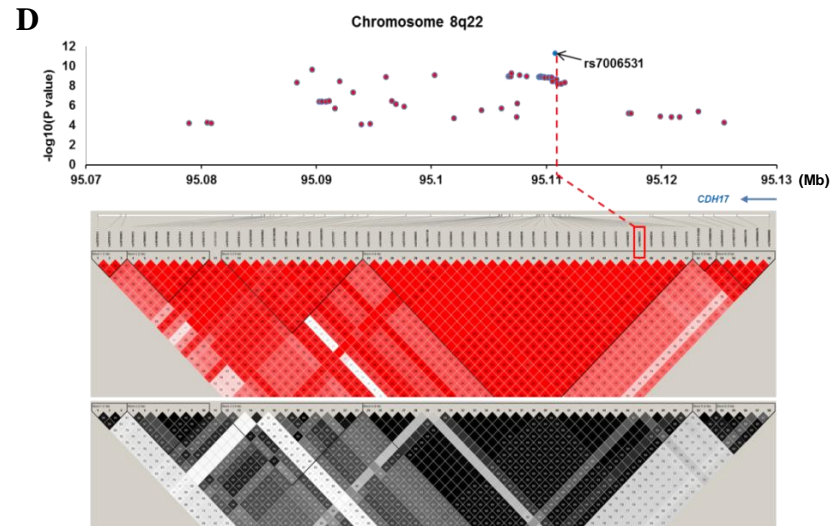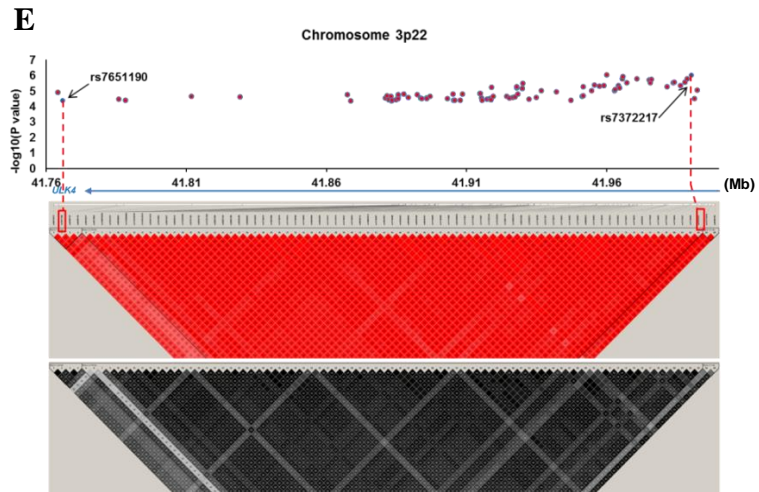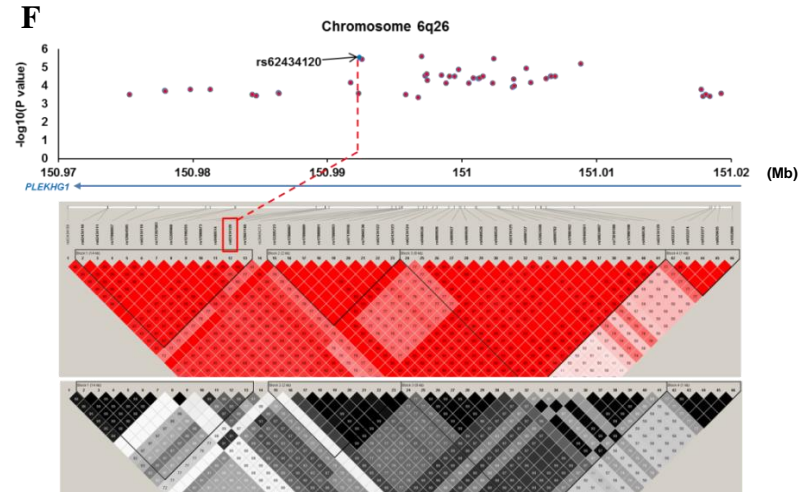

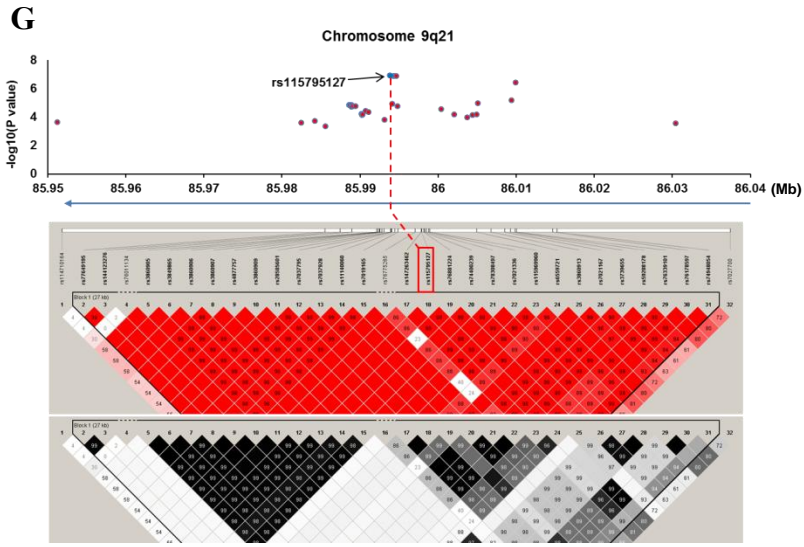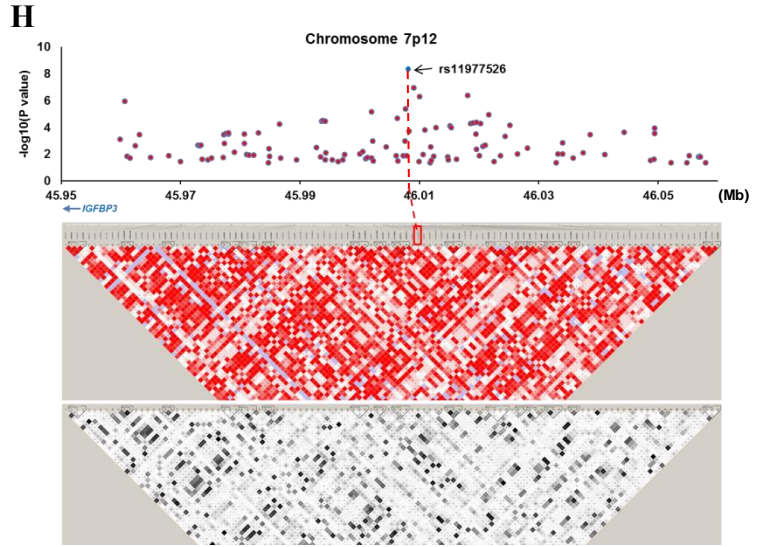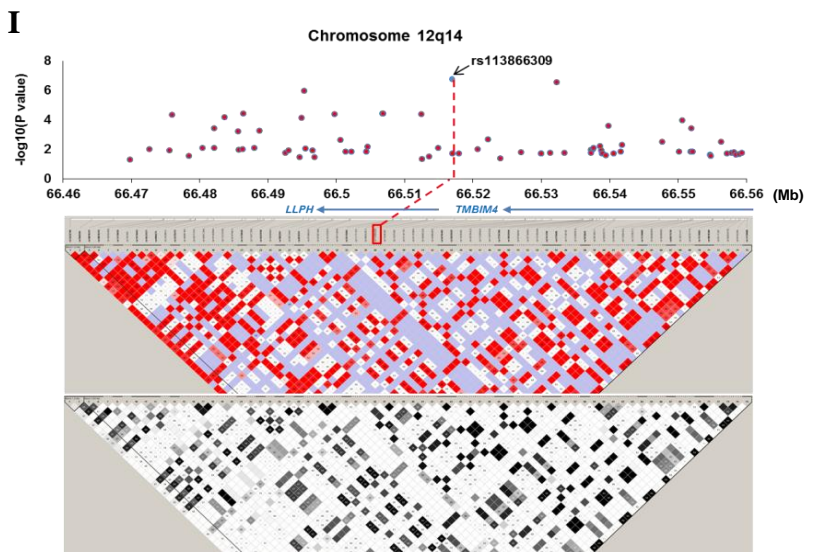

Supplement: pgen.1006728.s004.pdf [file pgen.1006728.s004.pdf]
