# Supplementary material for: Single-trait and multi-trait genome-wide association analyses identify novel loci for blood pressure in African-ancestry populations
Source: PubMed Central journal article supplement (PMC5446189; doi:10.1371/journal.pgen.1006728), 2017-05-12
Supplement: pgen.1006728.s006.pdf [file pgen.1006728.s006.pdf]

S1 Table. Descriptive Characteristics of the Discovery Studies

| Study                      | N     | Age (SD) | No. of Males (%) | BMI (SD) | No. with HTN (%) | No. with Hypertensive Medication (%) | SBP, mmHg (SD) | DBP, mmHg (SD) | PP in mmHg |
|----------------------------|-------|----------|------------------|----------|------------------|--------------------------------------|----------------|----------------|------------|
| <b>Discovery Cohorts</b>   |       |          |                  |          |                  |                                      |                |                |            |
| ARIC_AA                    | 2502  | 53 (6)   | 926 (37)         | 30 (6)   | 1451 (58)        | 1076 (43)                            | 135 (23)       | 84 (13)        | 51 (16)    |
| CARDIA                     | 826   | 39 (4)   | 339 (41)         | 31 (7)   | 206 (25)         | 107 (13)                             | 118 (18)       | 78 (13)        | 41 (11)    |
| CFS                        | 608   | 39 (20)  | 258 (42)         | 32 (10)  | 182 (13)         | 109 (18)                             | 126 (20)       | 76 (13)        | 50 (13)    |
| JHS                        | 2135  | 55 (13)  | 807 (38)         | 32 (7)   | 1328 (62)        | 1153 (54)                            | 134 (21)       | 84 (12)        | 51 (17)    |
| MESA                       | 1646  | 62 (10)  | 746 (45)         | 30 (6)   | 1022 (62)        | 839 (51)                             | 139 (25)       | 80 (12)        | 60 (18)    |
| CHS                        | 2064  | 76 (5)   | 834 (40)         | 26 (4)   | 1132 (55)        | 979 (47)                             | 133 (20)       | 69 (11)        | 63 (18)    |
| GeneSTAR                   | 1129  | 48 (12)  | 428 (38)         | 32 (8)   | 616 (55)         | 462 (41)                             | 129 (19)       | 81 (11)        | 48 (14)    |
| GENOA                      | 996   | 56 (11)  | 295 (30)         | 31 (7)   | 688 (69)         | 550 (56.9)                           | 136 (22)       | 78 (12)        | 57 (12)    |
| HANDLS                     | 950   | 49 (9)   | 424 (45)         | 30 (8)   | 519 (53)         | 348 (36)                             | 128 (21)       | 77 (13)        | 51 (14)    |
| HyperGEN                   | 1256  | 45 (13)  | 408 (33)         | 33 (8)   | 769 (61)         | --                                   | 136 (25)       | 79 (13)        | 57 (17)    |
| Maywood-Loyola             | 743   | 42 (8)   | 465 (63)         | 27 (8)   | 158 (21)         | 6 (1)                                | 121 (20)       | 77 (13)        | 44 (13)    |
| Nigeria-Loyola             | 1614  | 49 (15)  | 674 (42)         | 24 (5)   | 797 (49)         | 399 (25)                             | 135 (30)       | 84 (19)        | 52 (16)    |
| Loyola                     | 967   | 53 (14)  | 737 (76)         | 28 (7)   | 660 (68)         | 155 (16)                             | 149 (30)       | 92 (18)        | 57 (17)    |
| WHI-SHARe                  | 7989  | 61 (7)   | 0                | 32 (7)   | 4435 (56)        | 3692 (46)                            | 132 (18)       | 78 (9)         | 54 (15)    |
| HUFS                       | 1192  | 46 (14)  | 477 (40)         | 31 (9)   | 688 (58)         | 442 (37)                             | 132 (22)       | 82 (14)        | 50 (15)    |
| BioMe Biobank              | 2464  | 49 (14)  | 870 (35)         | 30 (8)   | 1126 (46)        | 854 (35)                             | 132 (22)       | 80 (14)        | 52 (16)    |
| HRS                        | 1337  | 67 (10)  | 483 (36)         | 31 (7)   | 1073 (80)        | 849 (64)                             | 144 (24)       | 86 (13)        | 58 (16)    |
| FBPP-AXIOM                 | 917   | 50 (14)  | 367 (40)         | 31 (7)   | 642 (70)         | 596 (65)                             | 129 (22)       | 74 (12)        | 55 (16)    |
| BioVU eMERGE I AA          | 1048  | 49 (16)  | 330 (31)         | 32 (9)   | 510 (49)         | 246 (23)                             | 135 (22)       | 81 (13)        | 54 (17)    |
| BioVU eMERGE II AA 1M      | 427   | 48 (15)  | 204 (48)         | 30 (8)   | 264 (62)         | 169 (40)                             | 138 (24)       | 83 (14)        | 56 (17)    |
| BioVU Fibroids AA          | 407   | 44 (15)  | 0 (0)            | 33 (9)   | 174 (43)         | 81 (20)                              | 134 (24)       | 82 (14)        | 53 (17)    |
| <b>Replication Cohorts</b> |       |          |                  |          |                  |                                      |                |                |            |
| Jamaica_GXE                | 613   | 40 (8)   | 141 (23)         | 13 (8)   | 142 (23)         | 0                                    | 118 (14)       | 71 (10)        | 47 (11)    |
| Jamaica_SPT                | 905   | 47 (14)  | 351 (39)         | 27 (6)   | 285 (31)         | 123 (14)                             | 122 (23)       | 71 (15)        | 52 (16)    |
| Uganda                     | 2668  | 35 (14)  | 774 (29)         | 24 (5)   | 1948 (73)        | 0                                    | 126 (21)       | 80 (12)        | 46 (15)    |
| WHI_GARNET                 | 4279  | 65 (7)   | 0                | 30 (6)   | 1721 (40)        | 1311 (31)                            | 131 (18)       | 76 (9)         | 55 (15)    |
| WHI_WHIMS                  | 5478  | 68 (6)   | 0                | 28 (6)   | 1859 (34)        | 1403 (26)                            | 130 (18)       | 75 (9)         | 56 (15)    |
| ARIC_EA                    | 9687  | 54 (6)   | 4650 (48)        | 27 (5)   | 2626 (27)        | --                                   | 118 (16)       | 72 (10)        | 47 (13)    |
| BioVU eMERGE II EA 1M      | 3428  | 54 (17)  | 1598 (47)        | 29 (7)   | 2500 (73)        | 1041 (30)                            | 129 (20)       | 75 (19)        | 53 (16)    |
| BioVU eMERGE II EA 5M      | 1045  | 51 (18)  | 499 (48)         | 30 (10)  | 642 (61)         | 239 (23)                             | 128 (20)       | 75 (12)        | 54 (17)    |
| Korea_hexa                 | 3702  | 53 (8)   | 1651 (45)        | 24 (3)   | 665 (18)         | 0                                    | 122 (14)       | 78 (10)        | 45 (9)     |
| Korea_kare                 | 8773  | 52 (9)   | 4117 (47)        | 25 (3)   | 2284 (26)        | 0                                    | 122 (19)       | 80 (11)        | 41 (12)    |
| Korea_nc2                  | 1814  | 61 (7)   | 858 (47)         | 25 (3)   | 796 (44)         | 0                                    | 134 (18)       | 84 (11)        | 50 (13)    |
| HCHS/SOL                   | 12278 | 46 (14)  | 5019 (41)        | 30 (6)   | 3445 (28)        | 2070 (17)                            | 125 (20)       | 75 (12)        | 50 (13)    |
