# Supplementary material for: Single-trait and multi-trait genome-wide association analyses identify novel loci for blood pressure in African-ancestry populations
Source: PubMed Central journal article supplement (PMC5446189; doi:10.1371/journal.pgen.1006728), 2017-05-12
Supplement: pgen.1006728.s007.pdf [file pgen.1006728.s007.pdf]

S2 Table: Genotyping, pre-imputation quality control, imputation and analysis methods in the participating studies

| Discovery Cohorts          | Genotyping Platform                        | Genotyping algorithm | Pre-imputation exclusive criteria |           |      |             | Variants included for imputation     | Imputation Software  | Imputation Reference                                            | Variants after imputation | Covariates                                                             |
|----------------------------|--------------------------------------------|----------------------|-----------------------------------|-----------|------|-------------|--------------------------------------|----------------------|-----------------------------------------------------------------|---------------------------|------------------------------------------------------------------------|
|                            |                                            |                      | Individual !                      | Call rate | MAF  | HWE P-value |                                      |                      |                                                                 |                           |                                                                        |
| ARIC                       | Affymetrix                                 | BirdSeed             | > 90%                             | < 90%     | < 1% | < 1.00E-6   | 796,384                              | MACH-Admix           | 1000 Genome Phase I integrated variant set (March 2012)         | 30,072,738                | Age + age*age + sex + bmi + 10PC                                       |
| CARDIA                     | Affymetrix                                 | BirdSeed             | > 90%                             | < 90%     | < 1% | < 1.00E-6   | 839,912                              | MACH-Admix           | 1000 Genome Phase I integrated variant set (March 2012)         | 30,072,738                | Age + age*age + sex + bmi + 10PC                                       |
| CFS                        | Affymetrix                                 | BirdSeed             | > 90%                             | < 90%     | < 1% | < 1.00E-6   | 867,495                              | MACH-Admix           | 1000 Genome Phase I integrated variant set (March 2012)         | 30,072,738                | Age + age*age + sex + bmi + 10PC                                       |
| JHS                        | Affymetrix                                 | BirdSeed             | > 90%                             | < 90%     | < 1% | < 1.00E-6   | 868,969                              | MACH-Admix           | 1000 Genome Phase I integrated variant set (March 2012)         | 30,072,738                | Age + age*age + sex + bmi + 10PC                                       |
| MESA                       | Affymetrix                                 | BirdSeed             | > 90%                             | < 90%     | < 1% | < 1.00E-6   | 881,666                              | MACH-Admix           | 1000 Genome Phase I integrated variant set (March 2012)         | 30,072,738                | Age + age*age + sex + bmi + 10PC                                       |
| CHS                        | Illumina                                   | BeadStudio           | >95%                              | < 97%     | none | < 1.00E-5   | 306,651                              | MACH                 | 1000 Genome Phase I integrated variant set (March 2012)         | 38,050,714                | Age + age*age + sex + cohort + 10PC                                    |
| GeneSTAR                   | Illumina                                   | GenomeStudio         | > 90%                             | < 90%     | NA   | < 1.00E-6   | 818,154                              | IMPUTE 2             | 1000 Genome Phase I integrated variant set (March 2012)         | 37,824,549                | Age + age*age + sex + BMI + 4PCs                                       |
| GENOA                      | Affymetrix+Illumina                        | BirdSeed and Beads   | > 95%                             | < 95%     | N/A  | N/A         | 761,689 (Affy), 1,013,737 (Illumina) | IMPUTE 2             | 1000 Genome Phase I integrated variant set (March 2012)         | 30,072,738                | Age + age*age + sex + bmi + 10PC                                       |
| HANDLS                     | Illumina                                   | GenomeStudio         | > 95%                             | < 95%     | < 1% | < 1.00E-7   | 907,763                              | MACH/minimac         | 1000 Genome Phase I integrated variant set (March 2012 release) | ~38M                      | Age + age*age + sex + bmi + 10PCs                                      |
| HyperGEN                   | Affymetrix                                 | BirdSeed             | > 90%                             | < 90%     | < 1% | < 1.00E-6   | 408,125                              | MACH/minimac         | 1000 Genome Phase I integrated variant set (March 2012)         | 37,824,549                | Age + age*age + sex + bmi + 10PC                                       |
| Maywood-Loyola             | Affymetrix                                 | BirdSeed             | > 90%                             | < 90%     | < 1% | < 1.00E-6   | 965,441                              | MACH-Admix           | 1000 Genome Phase I integrated variant set (March 2012)         | 30,072,738                | Age + age*age + sex + BMI + PC1-PC3                                    |
| Nigeria-Loyola             | Affymetrix                                 | BirdSeed             | > 90%                             | < 90%     | < 1% | < 1.00E-6   | 556,307                              | MACH-Admix           | 1000 Genome Phase I integrated variant set (March 2012)         | 30,072,738                | Age + age*age + sex + BMI + PC1                                        |
| Loyola                     | Axiom GW Human Array                       | Axiom GT1            | > 90%                             | < 90%     | < 1% | < 1.00E-6   | 607,982                              | MACH-Admix           | 1000 Genome Phase I integrated variant set (March 2012)         | 30,072,738                | Age + age*age + sex + bmi + 10PC                                       |
| WHI-SHARc                  | Affymetrix 6.0                             | Birdseed v2          | >95%                              | <95%      | <1%  | <1.00E-6    | 728,334                              | MACH/minimac         | 1000 Genome Phase I integrated variant set (March 2012)         | 30,072,738                | Age + age*age + bmi + center + 10PC                                    |
| HUFS                       | Affymetrix                                 | Birdseed             | > 90%                             | < 90%     | < 1% | < 1.00E-6   | 500,237                              | MACH-Admix           | 1000 Genome Phase I integrated variant set (March 2012)         | 30,072,738                | Age + age*age + sex + bmi + 3PC                                        |
| BioME Biobank              | Illumina                                   | GenomeStudio         | > 90%                             | < 95%     | < 1% | < 1.00E-5   | 845,969                              | IMPUTE2              | 1000 Genome Phase I integrated variant set (March 2012)         | -                         | Age + Age*Age + Sex + BMI + PC1-PC2                                    |
| HRS                        | Illumina                                   | GenomeStudio         | > 98%                             | < 98%     | < 1% | < 1.00E-4   | 2,195,306                            | IMPUTE2              | 1000 Genome Phase I integrated variant set (March 2012)         | 30,072,738                | Age + age*age + sex + bmi + 10PC                                       |
| FBPP                       | Affymetrix                                 | Birdseed             | > 90%                             | < 90%     | < 1% | < 1.00E-6   | 777,125                              | MACH-Admix           | 1000 Genome Phase I integrated variant set (March 2012)         | 30,072,738                | Age + age*age + sex + bmi + 10PC                                       |
| BioVU eMERGE I AA          | Illumina 1M                                | GenomeStudio         | >95%                              | >95%      | < 1% | < 1.00E-6   | 1,001,273                            | IMPUTE version 2.3.0 | 1000 Genome Phase III (October, 2014)                           | 81,682,398                | Age + age*age + sex + bmi + 10PC                                       |
| BioVU eMERGE II AA 1M      | Illumina 1M                                | GenomeStudio         | >95%                              | >95%      | < 1% | < 1.00E-6   | 826,686                              | IMPUTE version 2.3.0 | 1000 Genome Phase III (October, 2014)                           | 81,163,150                | Age + age*age + sex + bmi + 10PC                                       |
| BioVU Fibroids AA          | Affymetrix Biobank array and World Array 2 | BirdSeed             | >95%                              | >95%      | < 1% | < 1.00E-6   | 1,345,099                            | IMPUTE version 2.3.0 | 1000 Genome Phase III (October, 2014)                           | 81,064,813                | Age + age*age + sex + bmi + 10PC                                       |
| <b>Replication Cohorts</b> |                                            |                      |                                   |           |      |             |                                      |                      |                                                                 |                           |                                                                        |
| Jamaica_GXE                | Illumina MetaboChip                        | GeneCall             | > 90%                             | < 90%     | < 1% | < 1.00E-6   | 400,931                              | MACH-Admix           | 1000 Genome Phase I integrated variant set (March 2012)         | 30,072,738                | Age + age*age + sex + BMI + PC1-PC3                                    |
| Jamaica_SPT                | Illumina MetaboChip                        | GeneCall             | > 90%                             | < 90%     | < 1% | < 1.00E-6   | 387,665                              | MACH-Admix           | 1000 Genome Phase I integrated variant set (March 2012)         | 30,072,738                | Age + age*age + sex + BMI + PC1-PC3                                    |
| Uganda                     | Genra Puregene                             | GeneCall             | > 90%                             | < 90%     | < 1% | < 1.00E-6   | -                                    | -                    | -                                                               | -                         | Age + age*age + sex + BMI                                              |
| WHI_GARNET                 | Illumina HumanOmni1-Quad v1-0 B            | Birdseed v2          | >97%                              | >98%      | <1%  | <1.00E-4    | 844,092                              | Beagle/MACH          | 1000 Genome Phase I integrated variant set (March 2012)         | 30,072,738                | Age + age*age + bmi + center + 10PC                                    |
| WHI_WHIMS                  | HumanOmniExpressE xome-8v1_B               | Birdseed v2          | >98%                              | >98%      | <1%  | <1.00E-4    | 907,365                              | Beagle/MACH          | 1000 Genome Phase I integrated variant set (March 2012)         | 30,072,738                | Age + age*age + bmi + center + 10PC                                    |
| ARIC_white                 | Affymetrix                                 | BirdSeed             | > 90%                             | < 90%     | < 1% | < 1.00E-6   | 776,305                              | MACH-Admix           | 1000 Genome Phase I integrated variant set (March 2012)         | 30,072,738                | -                                                                      |
| BioVU eMERGE II EA 1M      | Illumina 1M                                | GenomeStudio         | >95%                              | >95%      | < 1% | < 1.00E-6   | 826,686                              | IMPUTE version 2.3.0 | 1000 Genome Phase III (October, 2014)                           | 81,422,501                | Age + age*age + sex + bmi + 10PC                                       |
| BioVU eMERGE II EA 5M      | Illumina 5M                                | GenomeStudio         | >95%                              | >95%      | < 1% | < 1.00E-6   | 2,404,308                            | IMPUTE version 2.3.0 | 1000 Genome Phase III (October, 2014)                           | 81,011,298                | Age + age*age + sex + bmi + 10PC                                       |
| Korea_hexa                 | Affymetrix                                 | BirdSeed             | > 5%                              | < 95%     | < 5% | < 1.00E-5   | 4,228                                | SHAPEIT/IMPUTE2      | 1000 Genome Phase I integrated variant set (March 2012)         | 361,521                   | Age + age*age + sex + bmi + 10PC                                       |
| Korea_kare                 | Affymetrix                                 | BirdSeed             | > 5%                              | < 95%     | < 5% | < 1.00E-5   | 3,865                                | SHAPEIT/IMPUTE2      | 1000 Genome Phase I integrated variant set (March 2012)         | 361,476                   | Age + age*age + sex + bmi + 10PC                                       |
| Korea_nc2                  | Affymetrix                                 | BirdSeed             | > 5%                              | < 95%     | < 5% | < 1.00E-5   | 6,569                                | SHAPEIT/IMPUTE2      | 1000 Genome Phase I integrated variant set (March 2012)         | 361,680                   | Age + age*age + sex + bmi + 10PC                                       |
| HCHS/SOL                   | Illumina Omni 2.5M + Custom                | GenomeStudio         | <98%                              | <98%      | NA   | <10E-5      | 2,294,032                            | IMPUTE2              | 1000 Genome phase 3                                             | 49,744,721                | Age + age*age + sex + study center + bmi + 5PC + log(sampling weights) |

PCs indicates principal components; QC indicated quality control
