# Supplementary material for: Single-trait and multi-trait genome-wide association analyses identify novel loci for blood pressure in African-ancestry populations
Source: PubMed Central journal article supplement (PMC5446189; doi:10.1371/journal.pgen.1006728), 2017-05-12
Supplement: pgen.1006728.s008.pdf [file pgen.1006728.s008.pdf]

**S3 Table: Genomic inflation factors by study and analysis.**

| <b>Study</b> | <b>N</b>     | <b>SBP - <math>\lambda_{GC}</math></b> | <b>DBP - <math>\lambda_{GC}</math></b> | <b>HTN - <math>\lambda_{GC}</math></b> | <b>PP - <math>\lambda_{GC}</math></b> |
|--------------|--------------|----------------------------------------|----------------------------------------|----------------------------------------|---------------------------------------|
| ARIC         | 2502         | 1                                      | 1.02                                   | 1.01                                   | 1.01                                  |
| CARDIA       | 826          | 0.99                                   | 0.99                                   | 1                                      | 1.01                                  |
| CFS          | 608          | 1.05                                   | 1.03                                   | 1.02                                   | 1.04                                  |
| CHS          | 815          | 1.01                                   | 1                                      | 1                                      | 1.02                                  |
| FBPP         | 917          | 0.96                                   | 0.98                                   | 0.97                                   | 0.99                                  |
| GENOA        | 996          | 0.99                                   | 0.99                                   | 1                                      | 0.99                                  |
| JHS          | 2135         | 0.98                                   | 0.99                                   | 0.99                                   | 1.01                                  |
| MESA         | 1646         | 0.98                                   | 1.01                                   | 1                                      | 0.99                                  |
| HyperGen     | 1256         | 1.08                                   | 1.07                                   | 1.05                                   | 1.06                                  |
| Loyola       | 967          | 0.99                                   | 1                                      | 0.98                                   | 0.99                                  |
| HRS          | 1337         | 0.99                                   | 1.01                                   | 0.99                                   | 1                                     |
| HUFS         | 1192         | 1.06                                   | 1.03                                   | 1.03                                   | 1.02                                  |
| IPM          | 2464         | 0.98                                   | 0.99                                   | 1                                      | 1                                     |
| Maywood      | 743          | 1.01                                   | 1.02                                   | 1.01                                   | 1                                     |
| WHI          | 7989         | 1.01                                   | 1.03                                   | 1.03                                   | 1.02                                  |
| HANDLS       | 950          | 0.99                                   | 1                                      | 1                                      | 1.02                                  |
| Nigeria      | 1614         | 1.09                                   | 1.05                                   | 1.02                                   | 1.02                                  |
| GeneSTAR     | 1129         | 1.02                                   | 1.06                                   | 1.04                                   | 1                                     |
| eMERGE       | 1048         | 1.03                                   | 1.05                                   | 1.01                                   | 1.02                                  |
| OMNI         | 427          | 1.01                                   | 1                                      | 0.99                                   | 1.01                                  |
| FIBROID      | 407          | 0.99                                   | 1.02                                   | 1.04                                   | 1                                     |
| <b>Total</b> | <b>31968</b> | <b>1</b>                               | <b>1.02</b>                            | <b>1.01</b>                            | <b>1.01</b>                           |

$\lambda$  indicates the genomic inflation factor. N indicates sample size.
