# Supplementary material for: Single-trait and multi-trait genome-wide association analyses identify novel loci for blood pressure in African-ancestry populations
Source: PubMed Central journal article supplement (PMC5446189; doi:10.1371/journal.pgen.1006728), 2017-05-12
Supplement: pgen.1006728.s009.pdf [file pgen.1006728.s009.pdf]

S4 Table. Conditional analysis of SNPs with P < 1.0E-06 in discover stage for single trait analysis

| Conditional SNP<br>(Independent SNP for<br>replication) | SNP                  | Chr        | Pos       | A1       | A2      | Gene                     | Effect   | SE               | P.value  | Effect<br>(conditional) | SE<br>(conditional) | P.value<br>(conditional) |        |        |
|---------------------------------------------------------|----------------------|------------|-----------|----------|---------|--------------------------|----------|------------------|----------|-------------------------|---------------------|--------------------------|--------|--------|
| <b>SBP</b>                                              |                      |            |           |          |         |                          |          |                  |          |                         |                     |                          |        |        |
| rs76987554                                              | rs9918487            | 6          | 134042960 | A        | G       | <i>TARID/<br/>TCF21*</i> | -1.2639  | 0.2555           | 7.55E-07 | -0.2810                 | 0.1957              | 0.1511                   |        |        |
|                                                         | rs57850577           | 6          | 134046495 | A        | G       |                          | 1.2660   | 0.2489           | 3.64E-07 | 0.3393                  | 0.1949              | 0.0817                   |        |        |
|                                                         | rs79889868           | 6          | 134052576 | C        | G       |                          | -1.2168  | 0.2440           | 6.13E-07 | -0.3251                 | 0.1932              | 0.0925                   |        |        |
|                                                         | rs80176668           | 6          | 134069965 | A        | G       |                          | 1.7082   | 0.2906           | 4.15E-09 | 0.1825                  | 0.1395              | 0.1908                   |        |        |
|                                                         | rs112734474          | 6          | 134073797 | T        | G       |                          | 1.7256   | 0.2910           | 3.02E-09 | 0.1921                  | 0.1379              | 0.1638                   |        |        |
|                                                         | rs79590186           | 6          | 134075021 | T        | C       |                          | -1.3953  | 0.2749           | 3.87E-07 | -0.1150                 | 0.1726              | 0.5054                   |        |        |
|                                                         | rs80328223           | 6          | 134076947 | T        | C       |                          | -1.7232  | 0.2915           | 3.39E-09 | -0.1808                 | 0.1362              | 0.1844                   |        |        |
|                                                         | rs76987554           | 6          | 134080855 | T        | C       |                          | -1.8492  | 0.3090           | 2.17E-09 | NA                      | NA                  | NA                       |        |        |
| rs79030490                                              | 6                    | 134087689  | A         | C        | -1.8344 | 0.3091                   | 2.96E-09 | NA               | NA       | NA                      |                     |                          |        |        |
| rs11563582                                              | rs17428380           | 7          | 27328929  | T        | C       | <i>EVXI/HOXA</i>         | 1.3794   | 0.2609           | 1.24E-07 | 0.0863                  | 0.1347              | 0.5220                   |        |        |
|                                                         | rs12535894           | 7          | 27329173  | C        | G       |                          | -1.2687  | 0.2553           | 6.72E-07 | -0.0601                 | 0.1469              | 0.6825                   |        |        |
|                                                         | rs113318709          | 7          | 27332148  | T        | C       |                          | 1.3424   | 0.2651           | 4.12E-07 | 0.0128                  | 0.1323              | 0.9231                   |        |        |
|                                                         | rs148340546          | 7          | 27333162  | A        | G       |                          | -1.3761  | 0.2590           | 1.08E-07 | -0.1058                 | 0.1375              | 0.4418                   |        |        |
|                                                         | rs7777128            | 7          | 27337113  | C        | G       |                          | 1.3821   | 0.2577           | 8.13E-08 | 0.1173                  | 0.1366              | 0.3905                   |        |        |
|                                                         | rs17428471           | 7          | 27337867  | T        | G       |                          | 1.3276   | 0.2522           | 1.41E-07 | 0.1690                  | 0.1534              | 0.2706                   |        |        |
|                                                         | rs17438166           | 7          | 27341976  | T        | C       |                          | 1.3827   | 0.2581           | 8.43E-08 | 0.1100                  | 0.1351              | 0.4158                   |        |        |
|                                                         | rs1009547            | 7          | 27342727  | A        | G       |                          | 1.3847   | 0.2582           | 8.15E-08 | 0.1111                  | 0.1351              | 0.4110                   |        |        |
|                                                         | rs55831032           | 7          | 27343535  | T        | C       |                          | 1.3716   | 0.2593           | 1.23E-07 | 0.0878                  | 0.1343              | 0.5134                   |        |        |
|                                                         | rs17438292           | 7          | 27347127  | A        | G       |                          | -1.3848  | 0.2644           | 1.62E-07 | -0.0577                 | 0.1317              | 0.6612                   |        |        |
|                                                         | rs17502580           | 7          | 27350607  | A        | G       |                          | -1.3376  | 0.2603           | 2.77E-07 | -0.0581                 | 0.1374              | 0.6724                   |        |        |
| rs11563582                                              | 7                    | 27351650   | A         | G        | 1.6125  | 0.2786                   | 7.09E-09 | NA               | NA       | NA                      |                     |                          |        |        |
| rs7941648                                               | rs7941648            | 11         | 5532222   | T        | G       | <i>HGB2</i>              | -1.2323  | 2.21E-01         | 2.43E-08 | NA                      | NA                  | NA                       |        |        |
|                                                         | rs3763880            | 11         | 5533606   | T        | G       |                          | 1.4268   | 0.2679           | 1.01E-07 | 0.4701                  | 0.2059              | 0.0224                   |        |        |
|                                                         | rs72887764           | 11         | 5545271   | T        | C       |                          | 1.2862   | 0.2413           | 9.77E-08 | 0.4505                  | 0.1893              | 0.0173                   |        |        |
| <b>DBP</b>                                              |                      |            |           |          |         |                          |          |                  |          |                         |                     |                          |        |        |
| rs7372217                                               | rs7651190            | 3          | 41765955  | A        | G       | <i>ULK4</i>              | -0.45    | 0.1099           | 4.20E-05 | -0.3366                 | 0.1824              | 0.0010                   |        |        |
|                                                         | rs1716975            | 3          | 41960006  | T        | C       |                          | 0.5759   | 0.1176           | 9.67E-07 | NA                      | NA                  | NA                       |        |        |
|                                                         | rs7372217            | 3          | 41990122  | A        | G       |                          | -0.5514  | 0.1125           | 9.50E-07 | NA                      | NA                  | NA                       |        |        |
| rs62312401                                              | rs7676999            | 4          | 116987529 | A        | G       | <i>NDST4/TRAMILI</i>     | 1.3123   | 2.38E-01         | 3.50E-08 | NA                      | NA                  | NA                       |        |        |
|                                                         | 4:116968554:GTTT/4   | 4          | 116934079 | T        | C       |                          | -1.2314  | 0.2311           | 9.86E-08 | -0.1433                 | 0.1203              | 0.2337                   |        |        |
|                                                         | rs62312401           | 4          | 116968554 | G        | GTTTAT  |                          | -1.2686  | 0.2344           | 6.19E-08 | -0.2317                 | 0.1400              | 0.0979                   |        |        |
| rs11563582                                              | rs2428433            | 7          | 27145517  | T        | C       | <i>EVXI/HOXA</i>         | -0.5765  | 0.1178           | 9.94E-07 | -0.5602                 | 0.1178              | 1.98E-06                 |        |        |
|                                                         | rs73071550           | 7          | 27149099  | T        | C       |                          | -0.5692  | 0.116            | 9.17E-07 | -0.5541                 | 0.1160              | 1.78E-06                 |        |        |
|                                                         | rs6461985            | 7          | 27150634  | T        | C       |                          | -0.5699  | 0.1158           | 8.60E-07 | -0.5551                 | 0.1158              | 1.64E-06                 |        |        |
|                                                         | rs7798733            | 7          | 27153281  | C        | G       |                          | -0.5691  | 0.1159           | 9.05E-07 | -0.5541                 | 0.1159              | 1.75E-06                 |        |        |
|                                                         | rs6969780            | 7          | 27159136  | C        | G       |                          | 0.6214   | 0.1152           | 6.95E-08 | 0.5591                  | 0.1148              | 1.11E-06                 |        |        |
|                                                         | rs6461987            | 7          | 27166956  | C        | G       |                          | 0.6364   | 0.1238           | 2.73E-07 | 0.5453                  | 0.1229              | 9.17E-06                 |        |        |
|                                                         | rs1801085            | 7          | 27168590  | A        | G       |                          | -0.5972  | 0.1134           | 1.40E-07 | -0.5351                 | 0.1130              | 2.17E-06                 |        |        |
|                                                         | rs6962314            | 7          | 27170159  | T        | C       |                          | 0.6283   | 0.1218           | 2.46E-07 | 0.5416                  | 0.1210              | 7.63E-06                 |        |        |
|                                                         | rs6976129            | 7          | 27177746  | T        | C       |                          | 0.6462   | 0.1243           | 2.03E-07 | 0.5558                  | 0.1235              | 6.73E-06                 |        |        |
|                                                         | rs17471520           | 7          | 27178790  | T        | C       |                          | -0.6073  | 0.1138           | 9.58E-08 | -0.5381                 | 0.1133              | 2.02E-06                 |        |        |
|                                                         | rs17502232           | 7          | 27323604  | T        | G       |                          | -0.8317  | 0.163            | 3.35E-07 | 0.0601                  | 0.0738              | 0.4154                   |        |        |
|                                                         | rs17473410           | 7          | 27324196  | T        | G       |                          | -0.8396  | 0.1632           | 2.68E-07 | 0.0547                  | 0.0735              | 0.4566                   |        |        |
|                                                         | rs17473424           | 7          | 27324369  | A        | G       |                          | 0.7873   | 0.1592           | 7.65E-07 | -0.0475                 | 0.0827              | 0.5662                   |        |        |
|                                                         | rs73073487           | 7          | 27324984  | A        | G       |                          | 0.8186   | 0.1672           | 9.83E-07 | -0.0810                 | 0.0804              | 0.3141                   |        |        |
|                                                         | rs17502260           | 7          | 27325313  | T        | C       |                          | -0.7875  | 0.1592           | 7.49E-07 | 0.0474                  | 0.0827              | 0.5664                   |        |        |
|                                                         | rs6961048            | 7          | 27328187  | C        | G       |                          | -0.7732  | 0.1563           | 7.49E-07 | 0.0381                  | 0.0834              | 0.6473                   |        |        |
|                                                         | rs17428380           | 7          | 27328929  | T        | C       |                          | 0.8543   | 0.1575           | 5.78E-08 | 0.0088                  | 0.0763              | 0.9079                   |        |        |
|                                                         | rs12535894           | 7          | 27329173  | C        | G       |                          | -0.8122  | 0.1541           | 1.36E-07 | -0.0222                 | 0.0847              | 0.7933                   |        |        |
|                                                         | rs113318709          | 7          | 27332148  | T        | C       |                          | 0.8363   | 0.1599           | 1.70E-07 | -0.0321                 | 0.0745              | 0.6667                   |        |        |
|                                                         | rs148340546          | 7          | 27333162  | A        | G       |                          | -0.846   | 0.1563           | 6.21E-08 | -0.0159                 | 0.0783              | 0.8392                   |        |        |
|                                                         | rs7777128            | 7          | 27337113  | C        | G       |                          | 0.8556   | 0.1555           | 3.74E-08 | 0.0294                  | 0.0778              | 0.7057                   |        |        |
|                                                         | rs17428471           | 7          | 27337867  | T        | G       |                          | 0.8208   | 0.1521           | 6.85E-08 | 0.0648                  | 0.0892              | 0.4675                   |        |        |
|                                                         | rs17438166           | 7          | 27341976  | T        | C       |                          | 0.8739   | 0.1557           | 2.01E-08 | 0.0429                  | 0.0769              | 0.5769                   |        |        |
|                                                         | rs1009547            | 7          | 27342727  | A        | G       |                          | 0.8756   | 0.1558           | 1.90E-08 | 0.0435                  | 0.0768              | 0.5705                   |        |        |
|                                                         | rs55831032           | 7          | 27343535  | T        | C       |                          | 0.8894   | 0.1565           | 1.32E-08 | 0.0502                  | 0.0761              | 0.5095                   |        |        |
|                                                         | rs17438292           | 7          | 27347127  | A        | G       |                          | -0.9136  | 0.1594           | 1.00E-08 | -0.0481                 | 0.0743              | 0.5173                   |        |        |
|                                                         | rs17502580           | 7          | 27350607  | A        | G       |                          | -0.8833  | 0.157            | 1.86E-08 | -0.0478                 | 0.0782              | 0.5412                   |        |        |
|                                                         | rs11563582           | 7          | 27351650  | A        | G       |                          | 1.0151   | 0.1654           | 8.45E-10 | NA                      | NA                  | NA                       |        |        |
|                                                         | rs917206             | 7          | 27385004  | A        | G       |                          | -1.2058  | 0.2447           | 8.32E-07 | -0.7071                 | 0.2310              | 0.0022                   |        |        |
|                                                         | rs11563582 rs6969780 | rs2428433  | 7         | 27145517 | T       |                          | C        | <i>EVXI/HOXA</i> | -0.5765  | 0.1178                  | 9.94E-07            | -0.0402                  | 0.0498 | 0.4194 |
|                                                         |                      | rs73071550 | 7         | 27149099 | T       |                          | C        |                  | -0.5692  | 0.116                   | 9.17E-07            | -0.0353                  | 0.0459 | 0.4421 |
|                                                         |                      | rs6461985  | 7         | 27150634 | T       |                          | C        |                  | -0.5699  | 0.1158                  | 8.60E-07            | -0.0359                  | 0.0453 | 0.4273 |
|                                                         |                      | rs7798733  | 7         | 27153281 | C       |                          | G        |                  | -0.5691  | 0.1159                  | 9.05E-07            | -0.0336                  | 0.0449 | 0.4538 |
| rs6969780                                               |                      | 7          | 27159136  | C        | G       | 0.6214                   | 0.1152   |                  | 6.95E-08 | NA                      | NA                  | NA                       |        |        |
| rs6461987                                               |                      | 7          | 27166956  | C        | G       | 0.6364                   | 0.1238   |                  | 2.73E-07 | 0.0514                  | 0.0695              | 0.4594                   |        |        |
| rs1801085                                               |                      | 7          | 27168590  | A        | G       | -0.5972                  | 0.1134   |                  | 1.40E-07 | NA                      | NA                  | NA                       |        |        |
| rs6962314                                               |                      | 7          | 27170159  | T        | C       | 0.6283                   | 0.1218   |                  | 2.46E-07 | 0.0476                  | 0.0660              | 0.4708                   |        |        |
| rs6976129                                               |                      | 7          | 27177746  | T        | C       | 0.6462                   | 0.1243   |                  | 2.03E-07 | 0.0635                  | 0.0709              | 0.3701                   |        |        |
| rs17471520                                              |                      | 7          | 27178790  | T        | C       | -0.6073                  | 0.1138   |                  | 9.58E-08 | -0.0241                 | 0.0411              | 0.5575                   |        |        |
| rs17502232                                              |                      | 7          | 27323604  | T        | G       | -0.8317                  | 0.163    |                  | 3.35E-07 | 0.0679                  | 0.0738              | 0.3575                   |        |        |
| rs17473410                                              |                      | 7          | 27324196  | T        | G       | -0.8396                  | 0.1632   |                  | 2.68E-07 | 0.0623                  | 0.0734              | 0.3964                   |        |        |
| rs17473424                                              |                      | 7          | 27324369  | A        | G       | 0.7873                   | 0.1592   |                  | 7.65E-07 | -0.0552                 | 0.0827              | 0.5045                   |        |        |
| rs73073487                                              |                      | 7          | 27324984  | A        | G       | 0.8186                   | 0.1672   |                  | 9.83E-07 | -0.0858                 | 0.0804              | 0.2862                   |        |        |
| rs17502260                                              |                      | 7          | 27325313  | T        | C       | -0.7875                  | 0.1592   |                  | 7.49E-07 | 0.0551                  | 0.0827              | 0.5048                   |        |        |
| rs6961048                                               |                      | 7          | 27328187  | C        | G       | -0.7732                  | 0.1563   |                  | 7.49E-07 | 0.0470                  | 0.0833              | 0.5730                   |        |        |
| rs17428380                                              |                      | 7          | 27328929  | T        | C       | 0.8543                   | 0.1575   |                  | 5.78E-08 | -0.0014                 | 0.0763              | 0.9852                   |        |        |
| rs12535894                                              |                      | 7          | 27329173  | C        | G       | -0.8122                  | 0.1541   |                  | 1.36E-07 | -0.0119                 | 0.0847              | 0.8884                   |        |        |
| rs113318709                                             |                      | 7          | 27332148  | T        | C       | 0.8363                   | 0.1599   |                  | 1.70E-07 | -0.0405                 | 0.0744              | 0.5863                   |        |        |
| rs148340546                                             |                      | 7          | 27333162  | A        | G       | -0.846                   | 0.1563   |                  | 6.21E-08 | -0.0061                 | 0.0783              | 0.9375                   |        |        |
| rs7777128                                               |                      | 7          | 27337113  | C        | G       | 0.8556                   | 0.1555   |                  | 3.74E-08 | 0.0189                  | 0.0778              | 0.8078                   |        |        |
| rs17428471                                              |                      | 7          | 27337867  | T        | G       | 0.8208                   | 0.1521   |                  | 6.85E-08 | 0.0469                  | 0.0892              | 0.5990                   |        |        |
| rs17438166                                              |                      | 7          | 27341976  | T        | C       | 0.8739                   | 0.1557   |                  | 2.01E-08 | 0.0340                  | 0.0768              | 0.6585                   |        |        |
| rs1009547                                               |                      | 7          | 27342727  | A        | G       | 0.8756                   | 0.1558   |                  | 1.90E-08 | 0.0347                  | 0.0767              | 0.6511                   |        |        |
| rs55831032                                              |                      | 7          | 27343535  | T        | C       | 0.8894                   | 0.1565   |                  | 1.32E-08 | 0.0418                  | 0.0761              | 0.5825                   |        |        |
| rs17438292                                              |                      | 7          | 27347127  | A        | G       | -0.9136                  | 0.1594   |                  | 1.00E-08 | -0.0410                 | 0.0743              | 0.5808                   |        |        |
| rs17502580                                              |                      | 7          | 27350607  | A        | G       | -0.8833                  | 0.157    |                  | 1.86E-08 | -0.0447                 | 0.0782              | 0.5673                   |        |        |
| rs11563582                                              |                      | 7          | 27351650  | A        | G       | 1.0151                   | 0.1654   |                  | 8.45E-10 | NA                      | NA                  | NA                       |        |        |
| rs917206                                                |                      | 7          | 27385004  | A        | G       | -1.2058                  | 0.2447   |                  | 8.32E-07 | -0.6353                 | 0.2306              | 0.0059                   |        |        |
| rs2123202                                               |                      | 9          | 28153553  | A        | C       | 0.6117                   | 0.1229   |                  | 6.46E-07 | 0.1099                  | 0.0755              | 0.1454                   |        |        |
| rs13294724                                              |                      | 9          | 28157548  | A        | G       | 0.6036                   | 0.1231   |                  | 9.38E-07 | 0.1035                  | 0.0762              | 0.1745                   |        |        |

|                        |                   |             |          |          |       |                      |                    |          |          |          |          |          |        |
|------------------------|-------------------|-------------|----------|----------|-------|----------------------|--------------------|----------|----------|----------|----------|----------|--------|
| rs71512425             | rs114334738       | 9           | 28165671 | T        | C     |                      | 1.2762             | 0.2552   | 5.73E-07 | 0.9782   | 0.2490   | 0.0001   |        |
|                        | rs71512425        | 9           | 28165694 | A        | G     |                      | 0.6974             | 0.1348   | 2.32E-07 | NA       | NA       | NA       |        |
|                        | rs115412864       | 9           | 28165783 | T        | C     | <i>LINGO2</i>        | 1.2684             | 0.2551   | 6.65E-07 | 0.9704   | 0.2488   | 9.63E-05 |        |
| rs71512425 rs114334738 | rs2123202         | 9           | 28153553 | A        | C     |                      | 0.6117             | 0.1229   | 6.46E-07 | 0.1080   | 0.0755   | 0.1524   |        |
|                        | rs13294724        | 9           | 28157548 | A        | G     |                      | 0.6036             | 0.1231   | 9.38E-07 | 0.1006   | 0.0762   | 0.1868   |        |
|                        | rs114334738       | 9           | 28165671 | T        | C     |                      | 1.2762             | 0.2552   | 5.73E-07 | NA       | NA       | NA       |        |
|                        | rs71512425        | 9           | 28165694 | A        | G     |                      | 0.6974             | 0.1348   | 2.32E-07 | NA       | NA       | NA       |        |
|                        | rs115412864       | 9           | 28165783 | T        | C     |                      | 1.2684             | 0.2551   | 6.65E-07 | NA       | NA       | NA       |        |
| <b>HTN</b>             |                   |             |          |          |       |                      |                    |          |          |          |          |          |        |
| rs10279895             | rs17501431        | 7           | 27251549 | T        | C     |                      | -0.1876            | 0.0355   | 1.24E-07 | -0.0690  | 0.0286   | 0.0157   |        |
|                        | rs17472588        | 7           | 27252767 | A        | C     |                      | 0.2005             | 0.0369   | 5.33E-08 | 0.0670   | 0.0283   | 0.0177   |        |
|                        | rs17501438        | 7           | 27253688 | C        | G     |                      | -0.197             | 0.0364   | 6.18E-08 | -0.0673  | 0.0282   | 0.0169   |        |
|                        | rs57330666        | 7           | 27274187 | A        | T     |                      | -0.1757            | 0.0351   | 5.73E-07 | -0.0448  | 0.0263   | 0.0880   |        |
|                        | rs17473046        | 7           | 27287676 | A        | C     |                      | 0.1691             | 0.0344   | 9.17E-07 | 0.0381   | 0.0253   | 0.1320   |        |
|                        | rs17501898        | 7           | 27289410 | A        | G     |                      | -0.1682            | 0.0344   | 9.93E-07 | -0.0376  | 0.0254   | 0.1381   |        |
|                        | rs28570591        | 7           | 27319622 | A        | G     |                      | -0.1768            | 0.0351   | 4.66E-07 | -0.0015  | 0.0161   | 0.9249   |        |
|                        | rs10279895        | 7           | 27328210 | A        | G     |                      | 0.1894             | 0.0337   | 1.84E-08 | NA       | NA       | NA       |        |
|                        | rs17473487        | 7           | 27331139 | T        | C     |                      | -0.1879            | 0.0337   | 2.54E-08 | NA       | NA       | NA       |        |
|                        | rs185372147       | 7           | 27331552 | T        | G     | <i>EVX1/HOXA</i>     | 0.1879             | 0.0337   | 2.54E-08 | NA       | NA       | NA       |        |
|                        | rs142887200       | 7           | 27333712 | T        | C     |                      | -0.1868            | 0.0336   | 2.68E-08 | NA       | NA       | NA       |        |
|                        | rs11564025        | 7           | 27335536 | T        | G     |                      | 0.1843             | 0.0335   | 3.80E-08 | NA       | NA       | NA       |        |
|                        | rs11564024        | 7           | 27335561 | T        | G     |                      | 0.179              | 0.0341   | 1.55E-07 | NA       | NA       | NA       |        |
|                        | rs10227075        | 7           | 27338363 | T        | C     |                      | 0.1823             | 0.0335   | 5.45E-08 | NA       | NA       | NA       |        |
|                        | rs10270510        | 7           | 27338373 | C        | G     |                      | -0.1844            | 0.0335   | 3.87E-08 | NA       | NA       | NA       |        |
|                        | rs11564019        | 7           | 27338558 | A        | G     |                      | -0.1844            | 0.0335   | 3.87E-08 | NA       | NA       | NA       |        |
|                        | rs17473690        | 7           | 27342386 | T        | G     |                      | -0.183             | 0.0337   | 5.45E-08 | NA       | NA       | NA       |        |
| rs11564010             | 7                 | 27344629    | C        | G        |       | -0.1802              | 0.0337             | 8.93E-08 | NA       | NA       | NA       |          |        |
| rs17502552             | 7                 | 27346216    | T        | G        |       | -0.1801              | 0.0339             | 1.04E-07 | NA       | NA       | NA       |          |        |
| rs12149202             | rs12149202        | 16          | 85700360 | A        | G     |                      | -0.1877            | 0.0345   | 5.14E-08 | NA       | NA       | NA       |        |
|                        | rs12149210        | 16          | 85700481 | A        | G     |                      | -0.1608            | 0.032    | 4.90E-07 | NA       | NA       | NA       |        |
|                        | 16:85708762:T_TTA | 16          | 85708762 | T        | TTAAG | <i>GSE1</i>          | 0.1576             | 0.0321   | 9.22E-07 | 0.0352   | 0.0229   | 0.1244   |        |
|                        | rs3815795         | 16          | 85712105 | T        | C     |                      | -0.1659            | 0.0317   | 1.72E-07 | -0.0213  | 0.0173   | 0.2173   |        |
| <b>PP</b>              |                   |             |          |          |       |                      |                    |          |          |          |          |          |        |
| rs192457787            | rs138594252       | 4           | 58730210 | T        | C     | <i>IGFBP7/ROLR2B</i> | -7.3815            | 1.5072   | 9.70E-07 | -1.5290  | 1.0133   | 0.1313   |        |
|                        | rs192457787       | 4           | 58795698 | A        | C     |                      | -8.4329            | 1.6081   | 1.57E-07 | NA       | NA       | NA       |        |
| rs150785606            | rs1723953         | 7           | 45993668 | A        | C     |                      | 1.9482             | 0.3976   | 9.61E-07 | 1.9547   | 0.3977   | 8.86E-07 |        |
|                        | rs11977526        | 7           | 46008110 | A        | G     |                      | -0.6674            | 0.1362   | 9.53E-07 | -0.6658  | 0.1362   | 1.02E-06 |        |
|                        | rs138317269       | 7           | 46989518 | T        | G     |                      | -8.0214            | 1.6386   | 9.82E-07 | NA       | NA       | NA       |        |
|                        | rs150785606       | 7           | 46990467 | T        | C     | <i>IGFBP3</i>        | 8.0378             | 1.6358   | 8.94E-07 | NA       | NA       | NA       |        |
| rs150785606, rs1723953 | rs1723953         | 7           | 45993668 | A        | C     |                      | 1.9482             | 0.3976   | 9.61E-07 | NA       | NA       | NA       |        |
|                        | rs11977526        | 7           | 46008110 | A        | G     |                      | -0.6674            | 0.1362   | 9.53E-07 | -0.6280  | 0.1360   | 3.88E-06 |        |
|                        | rs138317269       | 7           | 46989518 | T        | G     |                      | -8.0214            | 1.6386   | 9.82E-07 | NA       | NA       | NA       |        |
|                        | rs150785606       | 7           | 46990467 | T        | C     |                      | 8.0378             | 1.6358   | 8.94E-07 | NA       | NA       | NA       |        |
| rs7006531              | rs7831012         | 8           | 95088353 | C        | G     |                      | -0.9495            | 0.1622   | 4.78E-09 | -0.0309  | 0.0928   | 0.7391   |        |
|                        | rs7006922         | 8           | 95089653 | A        | C     |                      | 1.0757             | 0.1701   | 2.56E-10 | 0.0046   | 0.0698   | 0.9472   |        |
|                        | rs3018846         | 8           | 95090293 | A        | G     |                      | 0.7509             | 0.1487   | 4.41E-07 | 0.0406   | 0.1074   | 0.7053   |        |
|                        | rs2978160         | 8           | 95090481 | A        | C     |                      | -0.7518            | 0.1487   | 4.25E-07 | -0.0415  | 0.1074   | 0.6991   |        |
|                        | rs2978161         | 8           | 95090517 | C        | G     |                      | 0.7516             | 0.1486   | 4.28E-07 | 0.0431   | 0.1075   | 0.6881   |        |
|                        | rs2978165         | 8           | 95090906 | C        | G     |                      | -0.7519            | 0.1483   | 3.98E-07 | -0.0439  | 0.1071   | 0.6819   |        |
|                        | rs7845175         | 8           | 95091144 | A        | C     |                      | 0.7526             | 0.1483   | 3.87E-07 | 0.0446   | 0.1071   | 0.6772   |        |
|                        | 8:95091340:T_TG   | 8           | 95091340 | T        | TG    |                      | -0.9808            | 0.1998   | 9.14E-07 | -0.0412  | 0.1464   | 0.7782   |        |
|                        | rs7013153         | 8           | 95092061 | A        | C     |                      | -1.0402            | 0.1761   | 3.46E-09 | 0.0215   | 0.0859   | 0.8025   |        |
|                        | rs2978143         | 8           | 95093235 | A        | C     |                      | 0.8404             | 0.154    | 4.82E-08 | 0.0176   | 0.0975   | 0.8567   |        |
|                        | rs116136580       | 8           | 95096074 | T        | C     |                      | -1.0546            | 0.1738   | 1.30E-09 | 0.0406   | 0.0711   | 0.5673   |        |
|                        | rs6997440         | 8           | 95096603 | A        | G     |                      | 0.7975             | 0.1567   | 3.60E-07 | -0.0257  | 0.1017   | 0.8007   |        |
|                        | rs9987124         | 8           | 95096956 | A        | G     |                      | 0.7387             | 0.1489   | 6.99E-07 | -0.0051  | 0.1028   | 0.9604   |        |
|                        | rs114684581       | 8           | 95100302 | T        | C     |                      | -1.0687            | 0.1745   | 9.11E-10 | 0.0343   | 0.0703   | 0.6251   |        |
|                        | 8:95106468:GACAA  | 8           | 95106468 | G        | GACAA |                      | 1.2208             | 0.1834   | 2.80E-11 | NA       | NA       | NA       |        |
|                        | rs2513761         | 8           | 95106732 | A        | T     |                      | 0.8945             | 0.1472   | 1.24E-09 | 0.1848   | 0.1054   | 0.0795   |        |
|                        | rs2446846         | 8           | 95106768 | T        | C     |                      | 0.8956             | 0.1472   | 1.16E-09 | 0.1861   | 0.1054   | 0.0775   |        |
|                        | rs2513762         | 8           | 95106775 | A        | C     |                      | 0.8963             | 0.1472   | 1.13E-09 | 0.1868   | 0.1054   | 0.0764   |        |
|                        | rs2513763         | 8           | 95106936 | A        | C     |                      | -0.8954            | 0.1472   | 1.18E-09 | -0.1860  | 0.1054   | 0.0778   |        |
|                        | rs2446845         | 8           | 95106957 | T        | G     |                      | 0.9025             | 0.1458   | 6.06E-10 | 0.2137   | 0.1064   | 0.0445   |        |
|                        | rs2513764         | 8           | 95107477 | A        | C     |                      | -0.6961            | 0.1402   | 6.92E-07 | -0.1051  | 0.1110   | 0.3439   |        |
|                        | rs2446844         | 8           | 95107693 | A        | G     | <i>CDH17</i>         | -0.904             | 0.1473   | 8.38E-10 | -0.1935  | 0.1054   | 0.0664   |        |
|                        | rs2513765         | 8           | 95108327 | T        | C     |                      | -0.8948            | 0.1472   | 1.21E-09 | -0.1842  | 0.1053   | 0.0802   |        |
|                        | rs2446842         | 8           | 95109361 | A        | G     |                      | -0.8936            | 0.1473   | 1.31E-09 | -0.1807  | 0.1051   | 0.0855   |        |
|                        | rs2513767         | 8           | 95109404 | A        | G     |                      | 0.8936             | 0.1473   | 1.31E-09 | 0.1807   | 0.1051   | 0.0855   |        |
|                        | rs3101283         | 8           | 95109499 | T        | G     |                      | 0.8936             | 0.1473   | 1.31E-09 | 0.1806   | 0.1051   | 0.0856   |        |
|                        | rs2446840         | 8           | 95109531 | T        | G     |                      | 0.8970             | 0.1472   | 1.11E-09 | 0.1850   | 0.1051   | 0.0783   |        |
|                        | rs2446839         | 8           | 95109671 | A        | G     |                      | -0.8934            | 0.1473   | 1.33E-09 | -0.1804  | 0.1051   | 0.0859   |        |
|                        | rs2513769         | 8           | 95109812 | T        | C     |                      | -0.8928            | 0.1473   | 1.37E-09 | -0.1799  | 0.1051   | 0.0869   |        |
|                        | rs2513770         | 8           | 95109882 | A        | C     |                      | 0.8934             | 0.1477   | 1.47E-09 | 0.1877   | 0.1067   | 0.0785   |        |
|                        | rs2446838         | 8           | 95110200 | T        | G     |                      | 0.8908             | 0.1474   | 1.53E-09 | 0.1712   | 0.1043   | 0.1006   |        |
|                        | rs2446837         | 8           | 95110206 | T        | G     |                      | 0.8909             | 0.1474   | 1.52E-09 | 0.1713   | 0.1043   | 0.1004   |        |
|                        | rs2513771         | 8           | 95110421 | A        | T     |                      | 0.8908             | 0.1475   | 1.53E-09 | 0.1702   | 0.1043   | 0.1026   |        |
|                        | rs2446836         | 8           | 95110444 | C        | G     |                      | -0.8874            | 0.1474   | 1.75E-09 | -0.1678  | 0.1043   | 0.1076   |        |
|                        | rs2513772         | 8           | 95110454 | A        | C     |                      | -0.8905            | 0.1474   | 1.54E-09 | -0.1705  | 0.1042   | 0.1018   |        |
|                        | rs2513773         | 8           | 95110512 | T        | G     |                      | 0.8904             | 0.1474   | 1.55E-09 | 0.1704   | 0.1042   | 0.1020   |        |
|                        | rs2446835         | 8           | 95110552 | T        | G     |                      | -0.8733            | 0.1481   | 3.69E-09 | -0.1588  | 0.1060   | 0.1339   |        |
|                        | rs2446834         | 8           | 95110924 | T        | C     |                      | 0.8799             | 0.1473   | 2.34E-09 | 0.1607   | 0.1042   | 0.1229   |        |
|                        | rs2513774         | 8           | 95111025 | T        | C     |                      | -0.8516            | 0.1466   | 6.29E-09 | -0.1490  | 0.1055   | 0.1582   |        |
|                        | rs2446833         | 8           | 95111326 | T        | C     |                      | 0.9017             | 0.1554   | 6.56E-09 | 0.0293   | 0.0905   | 0.7457   |        |
|                        | rs2513775         | 8           | 95111617 | C        | G     |                      | 0.8650             | 0.1477   | 4.68E-09 | 0.1511   | 0.1055   | 0.1521   |        |
|                        | rs7006531         | 8           | 95110744 | A        | G     |                      | -1.1600            | 0.1680   | 5.03E-12 | NA       | NA       | NA       |        |
|                        | rs113866309       | rs113866309 | 12       | 66516948 | T     | C                    | <i>LLPH/TMBIM4</i> | -3.2809  | 0.6275   | 1.71E-07 | NA       | NA       | NA     |
|                        |                   | rs145704323 | 12       | 66532537 | A     | C                    |                    | 3.3753   | 0.6589   | 3.01E-07 | 0.6762   | 0.4097   | 0.0989 |
|                        | rs2414856         | rs7403071   | 15       | 65048309 | A     | G                    |                    | -0.6186  | 0.126    | 9.11E-07 | -0.0299  | 0.0611   | 0.6242 |
|                        |                   | rs7180635   | 15       | 65048912 | T     | C                    |                    | -0.6258  | 0.1246   | 5.07E-07 | -0.0502  | 0.0625   | 0.4223 |
|                        |                   | rs1976112   | 15       | 65059220 | A     | T                    |                    | -0.6287  | 0.1245   | 4.39E-07 | -0.0540  | 0.0626   | 0.3886 |
| rs1008917              |                   | 15          | 65059651 | T        | C     |                      | 0.6188             | 0.1257   | 8.61E-07 | 0.0329   | 0.0614   | 0.5915   |        |
| rs12899738             |                   | 15          | 65060028 | C        | G     | <i>RBPM2</i>         | 0.6188             | 0.1251   | 7.48E-07 | 0.0386   | 0.0621   | 0.5335   |        |
| rs2414856              |                   | 15          | 65072461 | A        | G     |                      | 0.6783             | 0.127    | 9.18E-08 | NA       | NA       | NA       |        |
| rs4777594              |                   | 15          | 65076993 | A        | G     |                      | 0.6543             | 0.1277   | 3.00E-07 | NA       | NA       | NA       |        |
| rs2087027              |                   | 15          | 65089675 | A        | G     |                      | 0.6376             | 0.13     | 9.39E-07 | 0.0503   | 0.0693</ |          |        |
