# Supplementary material for: Single-trait and multi-trait genome-wide association analyses identify novel loci for blood pressure in African-ancestry populations
Source: PubMed Central journal article supplement (PMC5446189; doi:10.1371/journal.pgen.1006728), 2017-05-12
Supplement: pgen.1006728.s010.pdf [file pgen.1006728.s010.pdf]

SS Table. 72 independent SNPs with  $P < 1.0 \times 10^{-6}$  in discover stage for SBP, DBP, PP, HTN or CPASSOC analysis.

| ID                                  | chr | pos       | A1 | A2      | SBP    |              |             |                 | DBP          |             |             |                 | HTN          |             |             |                 | PP           |              |             |                 | CPASSOC-SHom |                 | CPASSOC-SHet    |      | 1KG_African_freq | 1KG_European_freq |
|-------------------------------------|-----|-----------|----|---------|--------|--------------|-------------|-----------------|--------------|-------------|-------------|-----------------|--------------|-------------|-------------|-----------------|--------------|--------------|-------------|-----------------|--------------|-----------------|-----------------|------|------------------|-------------------|
|                                     |     |           |    |         | Effect | StdErr       | P-value     | N               | Effect       | StdErr      | P-value     | N               | Effect       | StdErr      | P-value     | N               | Effect       | StdErr       | P-value     | N               | P-value      | P-value         |                 |      |                  |                   |
| rs11302595                          | 1   | 38880204  | t  | c       | 0.99   | -7.38        | 4.21        | 7.90E-02        | 5212         | -2.19       | 2.04        | 2.80E-01        | 10249        | -0.96       | 0.62        | 1.20E-01        | 9282         | -11.25       | 2.27        | 6.80E-07        | 10249        | 9.19E-02        | 2.52E-01        | 0.99 | 1                |                   |
| rs36064592                          | 1   | 114462662 | a  | g       | 0.43   | 0.78         | 0.18        | 1.80E-05        | 31970        | 0.2         | 0.11        | 7.40E-02        | 31967        | 0.05        | 0.02        | 1.90E-02        | 28230        | 0.64         | 0.13        | 8.60E-07        | 31967        | 1.61E-03        | 1.51E-04        | 0.5  | 0.34             |                   |
| rs12063100                          | 1   | 188834544 | t  | g       | 0.02   | 2.95         | 0.88        | 8.30E-04        | 19870        | 1.13        | 0.53        | 3.20E-02        | 19867        | -0.19       | 0.11        | 7.70E-02        | 16108        | 1.88         | 0.63        | 3.00E-03        | 19867        | 2.37E-01        | 4.76E-07        | 0.02 | 0                |                   |
| rs59922837                          | 2   | 154175435 | a  | g       | 0.01   | 4.55         | 1.21        | 1.70E-04        | 20703        | 3.54        | 0.7         | 4.50E-07        | 20700        | 0.36        | 0.14        | 1.10E-02        | 18451        | 0.67         | 0.83        | 4.20E-01        | 22314        | 1.39E-05        | 3.88E-06        | 0    | 0                |                   |
| rs1918172                           | 2   | 156888500 | c  | g       | 0.36   | -0.92        | 0.18        | 2.90E-07        | 30714        | -0.51       | 0.11        | 2.60E-06        | 30711        | -0.03       | 0.02        | 9.30E-02        | 27244        | -0.44        | 0.13        | 6.00E-04        | 30711        | 1.82E-05        | 1.04E-06        | 0.41 | 0.11             |                   |
| rs7602674                           | 2   | 184538648 | t  | c       | 0.39   | -0.95        | 0.19        | 8.10E-07        | 30714        | -0.36       | 0.12        | 2.00E-03        | 30711        | -0.06       | 0.02        | 9.70E-03        | 27230        | -0.61        | 0.14        | 1.20E-05        | 30711        | 6.63E-05        | 7.00E-06        | 0.34 | 0.47             |                   |
| rs62180365                          | 2   | 192934117 | t  | g       | 0.77   | 1.05         | 0.2         | 2.40E-07        | 31970        | 0.47        | 0.12        | 1.00E-04        | 31967        | 0.1         | 0.02        | 1.30E-05        | 27923        | 0.62         | 0.14        | 1.90E-05        | 31967        | 2.63E-07        | 6.41E-07        | 0.79 | 0.47             |                   |
| <b>2:210033781:AT_A<sup>a</sup></b> | 2   | 210033781 | a  | at      | 0.06   | -1.39        | 0.39        | 4.00E-04        | 28554        | 0.07        | 0.23        | 7.50E-01        | 28551        | -0.1        | 0.05        | 3.20E-02        | 20616        | <b>-1.62</b> | <b>0.29</b> | <b>3.10E-08</b> | <b>24802</b> | 4.67E-02        | 1.68E-06        | 0.06 | 0.13             |                   |
| rs737126                            | 2   | 231896779 | a  | g       | 0.24   | 0.77         | 0.23        | 7.20E-04        | 30841        | 0.61        | 0.13        | 6.00E-06        | 30838        | 0.12        | 0.03        | 3.30E-06        | 26789        | 0.16         | 0.16        | 3.30E-01        | 28703        | 7.79E-07        | 1.51E-06        | 0.28 | 0.25             |                   |
| rs17042306                          | 3   | 5381728   | a  | g       | 0.88   | -1.25        | 0.28        | 1.10E-05        | 31970        | -0.79       | 0.17        | 3.00E-06        | 31967        | -0.13       | 0.03        | 1.30E-04        | 27728        | -0.54        | 0.21        | 8.80E-03        | 30918        | 6.58E-07        | 5.69E-06        | 0.89 | 0.9              |                   |
| <b>rs114821199<sup>a</sup></b>      | 3   | 40965875  | a  | g       | 0.01   | 4.42         | 1.04        | 2.30E-05        | 22648        | 0.2         | 0.6         | 7.40E-01        | 22645        | 0.18        | 0.12        | 1.40E-01        | 20396        | <b>4.21</b>  | <b>0.73</b> | <b>1.00E-08</b> | <b>22645</b> | 2.92E-02        | 1.87E-04        | 0.02 | 0                |                   |
| <b>rs7651190<sup>b</sup></b>        | 3   | 41765955  | a  | g       | 0.35   | 0.04         | 0.18        | 8.10E-01        | 30356        | -0.45       | 0.11        | 4.20E-05        | 30353        | -0.06       | 0.02        | 8.80E-03        | 26906        | 0.43         | 0.13        | 1.30E-03        | 30918        | 7.47E-03        | <b>6.87E-09</b> | 0.28 | 0.81             |                   |
| <b>rs147428270<sup>b</sup></b>      | 3   | 41868721  | t  | c       | 0.63   | 0.09         | 0.21        | 6.80E-01        | 31970        | -0.51       | 0.13        | 4.60E-05        | 31967        | -0.05       | 0.02        | 5.80E-02        | 28443        | 0.47         | 0.15        | 2.00E-03        | 30918        | 2.16E-02        | <b>2.49E-08</b> | 0.57 | 0.97             |                   |
| rs7372217                           | 3   | 41990122  | a  | g       | 0.34   | -0.14        | 0.19        | 4.60E-01        | 29585        | -0.55       | 0.11        | 9.50E-07        | 29582        | -0.07       | 0.02        | 1.40E-03        | 25731        | 0.33         | 0.14        | 1.60E-02        | 28533        | 3.55E-04        | 8.21E-06        | 0.29 | 0.8              |                   |
| rs9864989                           | 3   | 52684365  | t  | g       | 0.03   | 2.95         | 0.63        | 3.20E-06        | 19178        | 1.78        | 0.37        | 1.90E-06        | 19175        | 0.31        | 0.08        | 9.70E-05        | 15416        | 1.3          | 0.47        | 6.00E-03        | 19740        | 2.99E-07        | 2.59E-06        | 0.05 | 0                |                   |
| rs7654819                           | 4   | 11618714  | a  | c       | 0.27   | -0.6         | 0.19        | 2.00E-03        | 31970        | -0.4        | 0.12        | 5.20E-04        | 31967        | 0.04        | 0.02        | 1.10E-01        | 27987        | -0.23        | 0.14        | 9.20E-02        | 31540        | 9.15E-02        | 5.77E-08        | 0.29 | 0.3              |                   |
| rs192457787                         | 4   | 58795698  | a  | c       | 0.99   | -9.35        | 2.33        | 6.10E-05        | 14601        | -0.95       | 1.28        | 4.60E-01        | 15515        | -0.4        | 0.29        | 1.70E-01        | 14605        | -8.43        | 1.61        | 1.60E-07        | 15515        | 2.60E-02        | 4.83E-04        | 1    | 1                |                   |
| rs150834401                         | 4   | 103164224 | t  | c       | 0.11   | 1.16         | 0.28        | 4.80E-05        | 31970        | 0.86        | 0.17        | 4.80E-07        | 31967        | 0.04        | 0.03        | 1.90E-01        | 27648        | 0.31         | 0.2         | 1.20E-01        | 31540        | 9.27E-05        | 4.11E-06        | 0.14 | 0                |                   |
| <b>rs62312401<sup>a</sup></b>       | 4   | 116987529 | a  | g       | 0.94   | 1.64         | 0.4         | 3.80E-05        | 30356        | <b>1.31</b> | <b>0.24</b> | <b>3.50E-08</b> | <b>30353</b> | 0.13        | 0.05        | 5.00E-03        | 24655        | 0.61         | 0.29        | 3.50E-02        | 31540        | 1.91E-06        | 3.04E-07        | 0.96 | 0.77             |                   |
| rs182783477                         | 4   | 123592734 | c  | g       | 0.98   | -2.82        | 0.7         | 6.10E-05        | 29578        | -0.45       | 0.43        | 2.90E-01        | 29575        | -0.1        | 0.08        | 2.20E-01        | 24849        | -2.51        | 0.51        | 7.00E-07        | 29575        | 2.24E-02        | 4.86E-04        | 0.99 | 1                |                   |
| rs115236533                         | 5   | 19745715  | c  | g       | 0.01   | -2.96        | 1.07        | 5.50E-03        | 22648        | 0.29        | 0.62        | 6.30E-01        | 22645        | 0.19        | 0.12        | 1.30E-01        | 20396        | -2.92        | 0.74        | 7.70E-05        | 24259        | 9.37E-01        | 9.16E-07        | 0.01 | 0                |                   |
| rs3535431                           | 5   | 31910483  | a  | t       | 0.43   | -0.87        | 0.23        | 1.20E-04        | 30356        | -0.07       | 0.14        | 6.20E-01        | 30353        | -0.03       | 0.03        | 2.60E-01        | 26120        | -0.82        | 0.16        | 3.50E-07        | 31967        | 4.97E-02        | 9.08E-04        | 0.44 | 0.5              |                   |
| rs143572614                         | 5   | 62024475  | c  | g       | 0.99   | 7.93         | 2.8         | 4.60E-03        | 10582        | 6.21        | 1.54        | 5.80E-05        | 10579        | 1.44        | 0.29        | 7.80E-07        | 10636        | 2.06         | 1.98        | 3.00E-01        | 10579        | 2.81E-06        | 3.38E-06        | 0.99 | 1                |                   |
| rs189315540                         | 5   | 108796312 | t  | c       | 0.01   | 6.05         | 1.8         | 7.80E-04        | 16865        | 0.84        | 0.99        | 3.90E-01        | 17688        | 0.32        | 0.18        | 7.10E-02        | 18871        | 6.48         | 1.21        | 9.40E-08        | 17688        | 2.50E-02        | 5.49E-03        | 0.02 | 0                |                   |
| rs2584077                           | 6   | 46267046  | a  | c       | 0.01   | -5.05        | 1.46        | 5.30E-04        | 17352        | -4.16       | 0.83        | 4.90E-07        | 17349        | -0.24       | 0.16        | 1.40E-01        | 17406        | -0.86        | 1.04        | 4.10E-01        | 17349        | 1.64E-04        | 4.22E-06        | 0    | 0.06             |                   |
| rs9385284                           | 6   | 123400105 | a  | g       | 0.8    | -0.47        | 0.25        | 6.10E-02        | 29227        | -0.43       | 0.15        | 3.20E-03        | 29224        | 0.08        | 0.03        | 6.40E-03        | 25126        | 0.04         | 0.18        | 8.40E-01        | 30838        | 5.58E-01        | 5.56E-08        | 0.82 | 0.76             |                   |
| rs4487596                           | 6   | 123407496 | t  | c       | 0.8    | -0.59        | 0.23        | 1.10E-02        | 30356        | -0.4        | 0.14        | 4.10E-03        | 30353        | 0.05        | 0.03        | 5.20E-02        | 26266        | -0.11        | 0.16        | 4.90E-01        | 31967        | 2.61E-01        | 3.92E-07        | 0.81 | 0.76             |                   |
| <b>rs76987554<sup>ab</sup></b>      | 6   | 134080855 | t  | c       | 0.09   | <b>-1.85</b> | <b>0.31</b> | <b>2.20E-09</b> | <b>31970</b> | -0.91       | 0.19        | 1.10E-06        | 31967        | -0.12       | 0.04        | 9.20E-04        | 27480        | -0.99        | 0.22        | 5.70E-06        | 31967        | 6.69E-08        | <b>1.84E-08</b> | 0.09 | 0                |                   |
| <b>rs79030490<sup>ab</sup></b>      | 6   | 134087689 | a  | c       | 0.09   | <b>-1.83</b> | <b>0.31</b> | <b>3.00E-09</b> | <b>31970</b> | -0.92       | 0.19        | 8.70E-07        | 31967        | -0.12       | 0.04        | 7.00E-04        | 27480        | -0.96        | 0.22        | 1.00E-05        | 31967        | 7.01E-08        | <b>2.50E-08</b> | 0.91 | 1                |                   |
| rs62434120                          | 6   | 150992370 | t  | c       | 0.15   | -1.19        | 0.24        | 1.10E-06        | 31970        | -0.69       | 0.15        | 2.80E-06        | 31967        | -0.1        | 0.03        | 4.70E-04        | 27742        | -0.55        | 0.17        | 1.50E-03        | 31967        | 5.89E-07        | 2.23E-06        | 0.17 | 0.08             |                   |
| rs6969780                           | 7   | 27159136  | c  | g       | 0.3    | 0.82         | 0.19        | 1.70E-05        | 31155        | 0.62        | 0.12        | 6.90E-08        | 31152        | 0.08        | 0.02        | 5.30E-04        | 26701        | 0.23         | 0.13        | 8.90E-02        | 31152        | 4.06E-07        | 5.97E-07        | 0.35 | 0.1              |                   |
| <b>rs10279895<sup>ab</sup></b>      | 7   | 27328210  | a  | g       | 0.9    | 1.09         | 0.29        | 1.40E-04        | 31970        | 0.83        | 0.17        | 1.80E-06        | 31967        | <b>0.19</b> | <b>0.03</b> | <b>1.80E-08</b> | <b>26977</b> | 0.36         | 0.2         | 8.10E-02        | 31967        | <b>2.16E-08</b> | <b>3.24E-08</b> | 0.89 | 1                |                   |
| <b>rs11563582<sup>ab</sup></b>      | 7   | 27351650  | a  | g       | 0.13   | <b>1.61</b>  | <b>0.28</b> | <b>7.10E-09</b> | <b>30841</b> | <b>1.02</b> | <b>0.17</b> | <b>8.40E-10</b> | <b>30838</b> | 0.16        | 0.03        | 2.20E-06        | 26059        | 0.64         | 0.19        | 1.10E-03        | 30838        | <b>1.51E-10</b> | <b>1.08E-09</b> | 0.16 | 0.08             |                   |
| rs1723953                           | 7   | 45993668  | a  | c       | 0.03   | 1.87         | 0.56        | 9.00E-04        | 30393        | -0.03       | 0.34        | 9.20E-01        | 30390        | 0.13        | 0.07        | 4.60E-02        | 26631        | 1.95         | 0.4         | 9.60E-07        | 30390        | 5.25E-02        | 3.58E-05        | 0.03 | 0                |                   |
| <b>rs11977526<sup>b</sup></b>       | 7   | 46008110  | a  | g       | 0.34   | -0.24        | 0.19        | 2.10E-01        | 29227        | 0.39        | 0.12        | 7.50E-04        | 29224        | 0.01        | 0.02        | 8.40E-01        | 25372        | -0.67        | 0.14        | 9.50E-07        | 30838        | 4.10E-01        | <b>4.53E-09</b> | 0.35 | 0.41             |                   |
| rs150785606                         | 7   | 46990467  | t  | c       | 0.01   | 9.71         | 2.34        | 3.30E-05        | 10212        | 1.72        | 1.27        | 1.70E-01        | 11126        | 0.71        | 0.29        | 1.50E-02        | 10216        | 8.04         | 1.64        | 8.90E-07        | 11126        | 2.95E-03        | 2.69E-04        | 0    | 0                |                   |
| 7:80293263:A_AAT                    | 7   | 80293263  | a  | aatactc | 0.85   | -0.78        | 0.29        | 8.00E-03        | 25479        | -0.86       | 1.17        | 5.70E-07        | 25476        | -0.13       | 0.04        | 4.10E-04        | 20999        | 0.15         | 0.21        | 4.80E-01        | 23862        | 1.11E-05        | 4.96E-06        | 0.82 | 1                |                   |
| <b>rs115476423<sup>b</sup></b>      | 7   | 149199964 | c  | g       | 0.94   | 0.32         | 0.38        | 4.10E-01        | 31970        | 0.58        | 0.23        | 1.20E-02        | 31967        | -0.14       | 0.05        | 2.20E-03        | 27226        | -0.22        | 0.27        | 4.20E-01        | 31967        | 9.42E-01        | <b>4.99E-08</b> | 0.92 | 1                |                   |
| rs115706913                         | 8   | 14081817  | t  | c       | 0.95   | 0.77         | 0.43        | 7.10E-02        | 29227        | 0.36        | 0.25        | 1.50E-01        | 29224        | 0.26        | 0.05        | 2.70E-07        | 23954        | 0.33         | 0.3         | 2.80E-01        | 30838        | 6.40E-04        | 2.31E-06        | 0.93 | 0.07             |                   |
| rs10096908                          | 8   | 41641557  | t  | c       | 0.2    | 1.03         | 0.21        | 1.40E-06        | 31970        | 0.47        | 0.13        | 2.30E-04        | 31967        | 0.11        | 0.02        | 1.00E-05        | 27871        | 0.55         | 0.15        | 2.30E-04        | 31967        | 6.21E-07        | 1.63E-06        | 0.19 | 0.97             |                   |
| <b>rs7006531<sup>ab</sup></b>       |     |           |    |         |        |              |             |                 |              |             |             |                 |              |             |             |                 |              |              |             |                 |              |                 |                 |      |                  |                   |
