# Supplementary material for: Single-trait and multi-trait genome-wide association analyses identify novel loci for blood pressure in African-ancestry populations
Source: PubMed Central journal article supplement (PMC5446189; doi:10.1371/journal.pgen.1006728), 2017-05-12
Supplement: pgen.1006728.s011.pdf [file pgen.1006728.s011.pdf]

S6 Table. Trans-ethnic replication of 72 independent SNPs with  $P < 1.0 \times 10^{-6}$  in discover stage for SBP, DBP, PP, HTN or CPASSOC analysis.

| ID                     | Chromosome | Physical Position | Allele1 | Allele2 | EAF  | Trait | Discovery      |          |          |          | Trans-ethnic Replication |         |          |          | META Analysis (All) |         |          |          |                   |    |    |
|------------------------|------------|-------------------|---------|---------|------|-------|----------------|----------|----------|----------|--------------------------|---------|----------|----------|---------------------|---------|----------|----------|-------------------|----|----|
|                        |            |                   |         |         |      |       | Effect         | SE       | P Value  | N        | Effect                   | SE      | P Value  | N        | Effect              | SE      | P Value  | N        |                   |    |    |
| rs113025995            | 1          | 38880204          | t       | c       | 0.99 | SBP   | -7.3798        | 4.2054   | 7.93E-02 | 5212     | NA                       | NA      | NA       | NA       | NA                  | NA      | NA       | NA       | NA                |    |    |
|                        |            |                   |         |         |      |       | DBP            | -2.192   | 2.0445   | 2.84E-01 | 10249                    | NA      | NA       | NA       | NA                  | NA      | NA       | NA       | NA                | NA | NA |
|                        |            |                   |         |         |      |       | PP             | -11.2545 | 2.2652   | 6.75E-07 | 10249                    | NA      | NA       | NA       | NA                  | NA      | NA       | NA       | NA                | NA | NA |
|                        |            |                   |         |         |      |       | HTN            | -0.9586  | 0.6153   | 1.19E-01 | 9282                     | NA      | NA       | NA       | NA                  | NA      | NA       | NA       | NA                | NA | NA |
|                        |            |                   |         |         |      |       | CPASSOC (SHom) | NA       | NA       | 9.19E-02 | 5212/10249/9282          | NA      | NA       | NA       | NA                  | NA      | NA       | NA       | 9.19E-02          | NA |    |
|                        |            |                   |         |         |      |       | CPASSOC (SHet) | NA       | NA       | 2.52E-01 | 5212/10249/9282          | NA      | NA       | NA       | NA                  | NA      | NA       | NA       | 2.52E-01          | NA |    |
| rs36064592             | 1          | 114462662         | a       | g       | 0.43 | SBP   | 0.7792         | 0.1819   | 1.85E-05 | 31970    | -0.0888                  | 0.1512  | 5.57E-01 | 35270    | 0.2658              | 0.1163  | 2.22E-02 | 67240    | NA                |    |    |
|                        |            |                   |         |         |      |       | DBP            | 0.1954   | 0.1094   | 7.41E-02 | 31967                    | -0.0482 | 0.0926   | 6.03E-01 | 35270               | 0.0535  | 0.0707   | 4.49E-01 | 67237             | NA |    |
|                        |            |                   |         |         |      |       | PP             | 0.6374   | 0.1295   | 8.64E-07 | 31967                    | -0.018  | 0.1093   | 8.69E-01 | 35270               | 0.2546  | 0.0835   | 2.30E-03 | 67237             | NA |    |
|                        |            |                   |         |         |      |       | HTN            | 0.0494   | 0.021    | 1.88E-02 | 28229.5                  | -0.0336 | 0.0197   | 8.85E-02 | 35532               | 0.0053  | 0.0144   | 7.12E-01 | 63761.5           | NA |    |
|                        |            |                   |         |         |      |       | CPASSOC (SHom) | NA       | NA       | 1.61E-03 | 31970/31976/28229        | NA      | NA       | 2.49E-01 | 35270/35270/35532   | NA      | NA       | 5.62E-03 | 67240/67237/63762 | NA |    |
|                        |            |                   |         |         |      |       | CPASSOC (SHet) | NA       | NA       | 1.51E-04 | 31970/31976/28229        | NA      | NA       | 2.27E-01 | 35270/35270/35532   | NA      | NA       | 7.21E-04 | 67240/67237/63762 | NA |    |
| rs12063100             | 1          | 188834544         | t       | g       | 0.02 | SBP   | 2.9461         | 0.8816   | 8.33E-04 | 19869.9  | NA                       | NA      | NA       | NA       | NA                  | NA      | NA       | NA       | NA                |    |    |
|                        |            |                   |         |         |      |       | DBP            | 1.1281   | 0.5251   | 3.17E-02 | 19866.9                  | NA      | NA       | NA       | NA                  | NA      | NA       | NA       | NA                | NA |    |
|                        |            |                   |         |         |      |       | PP             | 1.8752   | 0.6315   | 2.99E-03 | 19866.9                  | NA      | NA       | NA       | NA                  | NA      | NA       | NA       | NA                | NA |    |
|                        |            |                   |         |         |      |       | HTN            | -0.19    | 0.1074   | 7.67E-02 | 16108                    | NA      | NA       | NA       | NA                  | NA      | NA       | NA       | NA                | NA |    |
|                        |            |                   |         |         |      |       | CPASSOC (SHom) | NA       | NA       | 2.37E-01 | 19869/19869/16108        | NA      | NA       | NA       | NA                  | NA      | NA       | NA       | 2.37E-01          | NA |    |
|                        |            |                   |         |         |      |       | CPASSOC (SHet) | NA       | NA       | 4.76E-07 | 19869/19869/16108        | NA      | NA       | NA       | NA                  | NA      | NA       | NA       | 4.76E-07          | NA |    |
| rs59922837             | 2          | 154175435         | a       | g       | 0.01 | SBP   | 4.5541         | 1.2119   | 1.71E-04 | 20703    | NA                       | NA      | NA       | NA       | NA                  | NA      | NA       | NA       | NA                |    |    |
|                        |            |                   |         |         |      |       | DBP            | 3.5366   | 0.7007   | 4.48E-07 | 20700                    | NA      | NA       | NA       | NA                  | NA      | NA       | NA       | NA                | NA |    |
|                        |            |                   |         |         |      |       | PP             | 0.6653   | 0.827    | 4.21E-01 | 22314                    | NA      | NA       | NA       | NA                  | NA      | NA       | NA       | NA                | NA |    |
|                        |            |                   |         |         |      |       | HTN            | 0.3643   | 0.1433   | 1.10E-02 | 18451                    | NA      | NA       | NA       | NA                  | NA      | NA       | NA       | NA                | NA |    |
|                        |            |                   |         |         |      |       | CPASSOC (SHom) | NA       | NA       | 1.39E-05 | 20703/20700/18451        | NA      | NA       | NA       | NA                  | NA      | NA       | NA       | 1.39E-05          | NA |    |
|                        |            |                   |         |         |      |       | CPASSOC (SHet) | NA       | NA       | 3.88E-06 | 20703/20700/18451        | NA      | NA       | NA       | NA                  | NA      | NA       | NA       | 3.88E-06          | NA |    |
| rs1918172              | 2          | 156888500         | c       | g       | 0.36 | SBP   | -0.9154        | 0.1785   | 2.90E-07 | 30714    | -0.1877                  | 0.1908  | 3.25E-01 | 37930    | -0.5758             | 0.1303  | 1.00E-05 | 68644    |                   |    |    |
|                        |            |                   |         |         |      |       | DBP            | -0.5079  | 0.1081   | 2.61E-06 | 30711                    | -0.0854 | 0.118    | 4.69E-01 | 37930               | -0.3151 | 0.0797   | 7.70E-05 | 68641             |    |    |
|                        |            |                   |         |         |      |       | PP             | -0.4356  | 0.127    | 6.04E-04 | 30711                    | -0.1969 | 0.1319   | 1.35E-01 | 37930               | -0.3207 | 0.0915   | 4.54E-04 | 68641             |    |    |
|                        |            |                   |         |         |      |       | HTN            | -0.0346  | 0.0206   | 9.26E-02 | 27243.7                  | 0.0023  | 0.0233   | 9.21E-01 | 38203               | -0.0184 | 0.0154   | 2.33E-01 | 65446.7           |    |    |
|                        |            |                   |         |         |      |       | CPASSOC (SHom) | NA       | NA       | 1.82E-05 | 30714/30711/27243        | NA      | NA       | 8.43E-01 | 37930/37930/37930   | NA      | NA       | 7.22E-04 | 68644/68641/65447 |    |    |
|                        |            |                   |         |         |      |       | CPASSOC (SHet) | NA       | NA       | 1.04E-06 | 30714/30711/27243        | NA      | NA       | 8.82E-01 | 37930/37930/37930   | NA      | NA       | 6.84E-05 | 68644/68641/65447 |    |    |
| rs7602674              | 2          | 184538648         | t       | c       | 0.39 | SBP   | -0.954         | 0.1934   | 8.13E-07 | 30714    | -0.118                   | 0.1458  | 4.18E-01 | 36162    | -0.4211             | 0.1164  | 2.99E-04 | 66876    |                   |    |    |
|                        |            |                   |         |         |      |       | DBP            | -0.3614  | 0.1167   | 1.96E-03 | 30711                    | -0.1669 | 0.0893   | 6.18E-02 | 36162               | -0.2387 | 0.0709   | 7.64E-04 | 66873             |    |    |
|                        |            |                   |         |         |      |       | PP             | -0.6061  | 0.1387   | 1.23E-05 | 30711                    | 0.038   | 0.1043   | 7.15E-01 | 36162               | -0.1945 | 0.0833   | 1.96E-02 | 66873             |    |    |
|                        |            |                   |         |         |      |       | HTN            | -0.0578  | 0.0223   | 9.66E-03 | 27230.4                  | -0.0077 | 0.0187   | 6.81E-01 | 36416               | -0.0284 | 0.0143   | 4.76E-02 | 63646.4           |    |    |
|                        |            |                   |         |         |      |       | CPASSOC (SHom) | NA       | NA       | 6.63E-05 | 30714/30711/27230        | NA      | NA       | 9.78E-02 | 36162/36162/36416   | NA      | NA       | 1.40E-04 | 66876/66873/63646 |    |    |
|                        |            |                   |         |         |      |       | CPASSOC (SHet) | NA       | NA       | 7.00E-06 | 30714/30711/27230        | NA      | NA       | 1.73E-01 | 36162/36162/36416   | NA      | NA       | 3.75E-05 | 66876/66873/63646 |    |    |
| rs62180365             | 2          | 192934117         | t       | g       | 0.77 | SBP   | 1.0454         | 0.2024   | 2.41E-07 | 31970    | -0.0247                  | 0.1277  | 8.47E-01 | 38978    | 0.2799              | 0.108   | 9.54E-03 | 70948    |                   |    |    |
|                        |            |                   |         |         |      |       | DBP            | 0.4723   | 0.1217   | 1.05E-04 | 31967                    | 0.0638  | 0.0785   | 4.16E-01 | 38978               | 0.1838  | 0.066    | 5.32E-03 | 70945             |    |    |
|                        |            |                   |         |         |      |       | PP             | 0.6162   | 0.1439   | 1.86E-05 | 31967                    | -0.1154 | 0.0912   | 2.06E-01 | 38978               | 0.0942  | 0.077    | 2.22E-01 | 70945             |    |    |
|                        |            |                   |         |         |      |       | HTN            | 0.1016   | 0.0233   | 1.31E-05 | 27922.8                  | -0.0192 | 0.0168   | 2.51E-01 | 39247               | 0.022   | 0.0136   | 1.06E-01 | 67169.8           |    |    |
|                        |            |                   |         |         |      |       | CPASSOC (SHom) | NA       | NA       | 2.63E-07 | 31970/31967/27922        | NA      | NA       | 5.44E-01 | 38978/38978/39247   | NA      | NA       | 2.36E-05 | 70948/70945/67170 |    |    |
|                        |            |                   |         |         |      |       | CPASSOC (SHet) | NA       | NA       | 6.41E-07 | 31970/31967/27922        | NA      | NA       | 4.19E-01 | 38978/38978/39247   | NA      | NA       | 3.22E-05 | 70948/70945/67170 |    |    |
| 2:210033781:AT_A       | 2          | 210033781         | a       | at      | 0.06 | SBP   | -1.3903        | 0.3929   | 4.03E-04 | 28554    | -0.0632                  | 0.2028  | 7.55E-01 | 49649    | -0.3424             | 0.1802  | 5.75E-02 | 78203    |                   |    |    |
|                        |            |                   |         |         |      |       | DBP            | 0.0739   | 0.2321   | 7.50E-01 | 28551                    | -0.0529 | 0.1233   | 6.68E-01 | 49649               | -0.025  | 0.1089   | 8.18E-01 | 78200             |    |    |
|                        |            |                   |         |         |      |       | PP             | -1.6191  | 0.2926   | 3.13E-08 | 24802                    | -0.2198 | 0.1308   | 9.30E-02 | 46093               | -0.453  | 0.1194   | 1.49E-04 | 70895             |    |    |
|                        |            |                   |         |         |      |       | HTN            | -0.1021  | 0.0475   | 3.17E-02 | 20615.5                  | -0.0153 | 0.0275   | 5.79E-01 | 36192               | -0.0371 | 0.0238   | 1.19E-01 | 56807.5           |    |    |
|                        |            |                   |         |         |      |       | CPASSOC (SHom) | NA       | NA       | 4.67E-02 | 28554/28551/20615        | NA      | NA       | 4.25E-01 | 49649/49649/36192   | NA      | NA       | 1.25E-01 | 78203/78200/56808 |    |    |
|                        |            |                   |         |         |      |       | CPASSOC (SHet) | NA       | NA       | 1.68E-06 | 28554/28551/20615        | NA      | NA       | 7.56E-01 | 49649/49649/36192   | NA      | NA       | 7.61E-05 | 78203/78200/56808 |    |    |
| rs737126               | 2          | 231896779         | a       | g       | 0.24 | SBP   | 0.7711         | 0.2281   | 7.23E-04 | 30841    | 0.1842                   | 0.1775  | 3.00E-01 | 35171    | 0.4056              | 0.1401  | 3.79E-03 | 66012    |                   |    |    |
|                        |            |                   |         |         |      |       | DBP            | 0.6105   | 0.1348   | 5.97E-06 | 30838                    | 0.0421  | 0.1087   | 6.98E-01 | 35171               | 0.2661  | 0.0846   | 1.66E-03 | 66009             |    |    |
|                        |            |                   |         |         |      |       | PP             | 0.1599   | 0.1628   | 3.26E-01 | 28703                    | 0.1227  | 0.1261   | 3.30E-01 | 35171               | 0.1367  | 0.0997   | 1.70E-01 | 63874             |    |    |
|                        |            |                   |         |         |      |       | HTN            | 0.1225   | 0.0263   | 3.27E-06 | 26789                    | 0.0207  | 0.0225   | 3.58E-01 | 35399               | 0.0638  | 0.0171   | 1.93E-04 | 62188             |    |    |
|                        |            |                   |         |         |      |       | CPASSOC (SHom) | NA       | NA       | 7.79E-07 | 30841/30838/26789        | NA      | NA       | 3.30E-01 | 35171/35171/35399   | NA      | NA       | 1.18E-05 | 66012/66009/62188 |    |    |
|                        |            |                   |         |         |      |       | CPASSOC (SHet) | NA       | NA       | 1.51E-06 | 30841/30838/26789        | NA      | NA       | 6.77E-01 | 35171/35171/35399   | NA      | NA       | 5.76E-05 | 66012/66009/62188 |    |    |
| rs17042306             | 3          | 5381728           | a       | g       | 0.88 | SBP   | -1.2546        | 0.2849   | 1.06E-05 | 31970    | 0.397                    | 0.254   | 1.18E-01 | 35125    | -0.3344             | 0.1896  | 7.78E-02 | 67095    |                   |    |    |
|                        |            |                   |         |         |      |       | DBP            | -0.7937  | 0.17     | 3.05E-06 | 31967                    | 0.1412  | 0.1565   | 3.67E-01 | 35125               | -0.2877 | 0.1151   | 1.25E-02 | 67092             |    |    |
|                        |            |                   |         |         |      |       | PP             | -0.538   | 0.2053   | 8.77E-03 | 30918                    | 0.3106  | 0.1873   | 9.73E-02 | 35125               | -0.0749 | 0.1384   | 5.88E-01 | 66043             |    |    |
|                        |            |                   |         |         |      |       | HTN            | -0.126   | 0.0329   | 1.30E-04 | 27727.9                  | -0.0011 | 0.0332   | 9.74E-01 | 35383               | -0.0641 | 0.0234   | 6.08E-03 | 63110.9           |    |    |
|                        |            |                   |         |         |      |       | CPASSOC (SHom) | NA       | NA       | 6.58E-07 | 31970/31967/27727        | NA      | NA       | 7.03E-01 | 35125/35125/35383   | NA      | NA       | 2.96E-05 | 67095/67092/63111 |    |    |
|                        |            |                   |         |         |      |       | CPASSOC (SHet) | NA       | NA       | 5.69E-06 | 31970/31967/27727        | NA      | NA       | 4.46E-01 | 35125/35125/35383   | NA      | NA       | 9.94E-05 | 67095/67092/63111 |    |    |
| rs114821199            | 3          | 40965875          | a       | g       | 0.01 | SBP   | 4.4192         | 1.0433   | 2.28E-05 | 22648    | -1.7438                  | 2.3296  | 4.54E-01 | 13817    | 3.3896              | 0.9522  | 3.71E-04 | 36465    |                   |    |    |
|                        |            |                   |         |         |      |       | DBP            | 0.2012   | 0.6004   | 7.38E-01 | 22645                    | -0.569  | 1.4464   | 6.94E-01 | 13817               | 0.088   | 0.5545   | 8.74E-01 | 36462             |    |    |
|                        |            |                   |         |         |      |       | PP             | 4.2099   | 0.7349   | 1.01E-08 | 22645                    | -0.3834 | 0.8188   | 6.40E-01 | 16476               | 2.1606  | 0.5469   | 7.80E-05 | 39121             |    |    |
|                        |            |                   |         |         |      |       | HTN            | 0.1781   | 0.121    | 1.41E-01 | 20396                    | -0.2443 | 0.1603   | 1.28E-01 | 16692               | 0.0248  | 0.0966   | 7.97E-01 | 37088             |    |    |
|                        |            |                   |         |         |      |       | CPASSOC (SHom) | NA       | NA       | 2.92E-02 | 22648/22645/20396        | NA      | NA       | 5.10E-01 | 13817/13817/16692   | NA      | NA       | 1.10E-01 | 36465/36462/37088 |    |    |
|                        |            |                   |         |         |      |       | CPASSOC (SHet) | NA       | NA       | 1.87E-04 | 22648/22645/20396        | NA      | NA       | 7.50E-01 | 13817/13817/16692   | NA      | NA       | 4.00E-03 | 36465/36462/37088 |    |    |
| rs7651190 <sup>a</sup> | 3          | 41765955          | a       | g       | 0.35 | SBP   | 0.0447         | 0.1825   | 8.07E-01 | 30356    | -0.0501                  | 0.1392  | 7.19E-01 | 51662    | -0.0152             | 0.1107  | 8.91E-01 | 82018    |                   |    |    |
|                        |            |                   |         |         |      |       | DBP            | -0.4501  | 0.1099   | 4.20E-05 | 30353                    | -0.3808 | 0.0863   | 1.02E-05 | 51662               | -0.4072 | 0.0679   | 1.97E-09 | 82015             |    |    |
|                        |            |                   |         |         |      |       | PP             | 0.4271   | 0.1323   | 1.25E-03 | 30918                    | 0.125   | 0.099    | 2.07E-01 | 51662               | 0.2335  | 0.0793   | 3.23E-03 | 82580             |    |    |
|                        |            |                   |         |         |      |       | HTN            | -0.0563  | 0.0215   | 8.79E-03 | 26905.7                  | -0.0179 | 0.0188   | 3.39E-01 | 51935               | -0.0345 | 0.0141   | 1.46E-02 | 78840.7           |    |    |
|                        |            |                   |         |         |      |       | CPASSOC (SHom) | NA       | NA       | 7.47E-03 | 30356/30353              |         |          |          |                     |         |          |          |                   |    |    |



|                           |   |           |   |   |      |                |                |               |                 |                          |                |               |                 |                          |                |               |                 |                          |
|---------------------------|---|-----------|---|---|------|----------------|----------------|---------------|-----------------|--------------------------|----------------|---------------|-----------------|--------------------------|----------------|---------------|-----------------|--------------------------|
|                           |   |           |   |   |      | CPASSOC (SHet) | NA             | NA            | 1.63E-06        | 31970/31967/27870        | NA             | NA            | 4.15E-01        | 37570/37570/37839        | NA             | NA            | 3.03E-05        | 69540/69537/65910        |
| rs7006531*                | 8 | 95110744  | a | g | 0.85 | SBP            | -0.8494        | 0.2372        | 3.43E-04        | 31970                    | -0.7612        | 0.4429        | 8.57E-02        | 40920                    | -0.8297        | 0.2091        | 7.25E-05        | 72890                    |
|                           |   |           |   |   |      | DBP            | 0.3108         | 0.1433        | 3.01E-02        | 31967                    | 0.457          | 0.3875        | 2.38E-01        | 38254                    | 0.3284         | 0.1344        | 1.46E-02        | 70221                    |
|                           |   |           |   |   |      | PP             | <b>-1.1601</b> | <b>0.168</b>  | <b>5.03E-12</b> | <b>31967</b>             | -0.5275        | 0.3176        | 9.67E-02        | 40920                    | <b>-1.0218</b> | <b>0.1485</b> | <b>5.96E-12</b> | <b>72887</b>             |
|                           |   |           |   |   |      | HTN            | -0.0152        | 0.0274        | 5.78E-01        | 27733.8                  | 0.0403         | 0.0882        | 6.48E-01        | 38526                    | -0.0103        | 0.0262        | 6.94E-01        | 66259.8                  |
|                           |   |           |   |   |      | CPASSOC (SHom) | NA             | NA            | 5.63E-01        | 31970/31967/27733        | NA             | NA            | 9.11E-01        | 40920/38254/38526        | NA             | NA            | 9.22E-01        | 72890/70221/66260        |
|                           |   |           |   |   |      | CPASSOC (SHet) | NA             | NA            | <b>7.56E-14</b> | <b>31970/31967/27733</b> | NA             | NA            | <b>6.13E-03</b> | <b>40920/38254/38526</b> | NA             | NA            | <b>2.19E-13</b> | <b>72890/70221/66260</b> |
| rs186208701               | 8 | 99580116  | t | c | 0.99 | SBP            | -0.9056        | 0.8754        | 3.01E-01        | 23777                    | NA             | NA            | NA              | NA                       | NA             | NA            | NA              | NA                       |
|                           |   |           |   |   |      | DBP            | 1.291          | 0.5168        | 1.25E-02        | 23774                    | NA             | NA            | NA              | NA                       | NA             | NA            | NA              | NA                       |
|                           |   |           |   |   |      | PP             | -2.117         | 0.623         | 6.79E-04        | 25388                    | NA             | NA            | NA              | NA                       | NA             | NA            | NA              | NA                       |
|                           |   |           |   |   |      | HTN            | -0.1806        | 0.1002        | 7.15E-02        | 21525                    | NA             | NA            | NA              | NA                       | NA             | NA            | NA              | NA                       |
|                           |   |           |   |   |      | CPASSOC (SHom) | NA             | NA            | 8.82E-01        | 23777/23774/21525        | NA             | NA            | NA              | NA                       | NA             | NA            | NA              | 8.82E-01                 |
|                           |   |           |   |   |      | CPASSOC (SHet) | NA             | NA            | 7.77E-07        | 23777/23774/21525        | NA             | NA            | NA              | NA                       | NA             | NA            | 7.77E-07        | NA                       |
| rs187821766               | 8 | 99741278  | t | c | 0.02 | SBP            | 0.6681         | 0.9348        | 4.75E-01        | 14176                    | NA             | NA            | NA              | NA                       | NA             | NA            | NA              | NA                       |
|                           |   |           |   |   |      | DBP            | -1.6757        | 0.5577        | 2.66E-03        | 14173                    | NA             | NA            | NA              | NA                       | NA             | NA            | NA              | NA                       |
|                           |   |           |   |   |      | PP             | 2.2392         | 0.6959        | 1.29E-03        | 14173                    | NA             | NA            | NA              | NA                       | NA             | NA            | NA              | NA                       |
|                           |   |           |   |   |      | HTN            | 0.1939         | 0.1049        | 6.45E-02        | 12891                    | NA             | NA            | NA              | NA                       | NA             | NA            | NA              | NA                       |
|                           |   |           |   |   |      | CPASSOC (SHom) | NA             | NA            | 8.91E-01        | 14176/14173/12891        | NA             | NA            | NA              | NA                       | NA             | NA            | NA              | 8.91E-01                 |
|                           |   |           |   |   |      | CPASSOC (SHet) | NA             | NA            | 9.25E-08        | 14176/14173/12891        | NA             | NA            | NA              | NA                       | NA             | NA            | 9.25E-08        | NA                       |
| rs79455834                | 8 | 122045324 | a | c | 0.96 | SBP            | 1.7549         | 0.4515        | 1.02E-04        | 31155                    | 0.1733         | 1.275         | 8.92E-01        | 27691                    | 1.5787         | 0.4256        | 2.08E-04        | 58846                    |
|                           |   |           |   |   |      | DBP            | 1.1009         | 0.274         | 5.85E-05        | 31152                    | 0.8366         | 0.8333        | 3.15E-01        | 27691                    | 1.0751         | 0.2603        | 3.62E-05        | 58843                    |
|                           |   |           |   |   |      | PP             | 0.7324         | 0.319         | 2.17E-02        | 31152                    | -0.7314        | 0.9673        | 4.50E-01        | 27691                    | 0.5888         | 0.3029        | 5.20E-02        | 58843                    |
|                           |   |           |   |   |      | HTN            | 0.2535         | 0.0527        | 1.48E-06        | 26392.1                  | 0.125          | 0.1893        | 5.09E-01        | 27958                    | 0.2443         | 0.0508        | 1.50E-06        | 54350.1                  |
|                           |   |           |   |   |      | CPASSOC (SHom) | NA             | NA            | 6.55E-07        | 31155/31152/26392        | NA             | NA            | 3.26E-01        | 27691/27691/27958        | NA             | NA            | 9.95E-06        | 58846/58843/54350        |
|                           |   |           |   |   |      | CPASSOC (SHet) | NA             | NA            | 4.93E-06        | 31155/31152/26392        | NA             | NA            | 7.52E-01        | 27691/27691/27958        | NA             | NA            | 1.91E-04        | 58846/58843/54350        |
| rs3866719                 | 8 | 134932570 | t | c | 0.82 | SBP            | 1.084          | 0.235         | 3.98E-06        | 30714                    | -0.0146        | 0.1309        | 9.11E-01        | 36781                    | 0.2456         | 0.1144        | 3.18E-02        | 67495                    |
|                           |   |           |   |   |      | DBP            | 0.583          | 0.1423        | 4.21E-05        | 30711                    | 0.0827         | 0.0802        | 3.03E-01        | 36781                    | 0.2033         | 0.0699        | 3.62E-03        | 67492                    |
|                           |   |           |   |   |      | PP             | 0.5419         | 0.1685        | 1.30E-03        | 30711                    | -0.0892        | 0.0937        | 3.41E-01        | 36781                    | 0.06           | 0.0819        | 4.64E-01        | 67492                    |
|                           |   |           |   |   |      | HTN            | 0.1148         | 0.0271        | 2.22E-05        | 18238                    | -0.0102        | 0.0172        | 5.53E-01        | 37024                    | 0.0256         | 0.0145        | 7.71E-02        | 55262                    |
|                           |   |           |   |   |      | CPASSOC (SHom) | NA             | NA            | 5.87E-07        | 30714/30711/18238        | NA             | NA            | 8.24E-01        | 36781/36781/37024        | NA             | NA            | 3.58E-05        | 67495/67492/55262        |
|                           |   |           |   |   |      | CPASSOC (SHet) | NA             | NA            | 5.08E-06        | 30714/30711/18238        | NA             | NA            | 7.18E-01        | 36781/36781/37024        | NA             | NA            | 1.81E-04        | 67495/67492/55262        |
| rs78192203*               | 8 | 142375073 | a | t | 0.20 | SBP            | -0.8242        | 0.2257        | 2.61E-04        | 31970                    | -2.0961        | 0.5973        | 4.50E-04        | 30714                    | -0.9831        | 0.2111        | 3.22E-06        | 62684                    |
|                           |   |           |   |   |      | DBP            | <b>-0.7722</b> | <b>0.1357</b> | <b>1.26E-08</b> | <b>31967</b>             | <b>-1.3428</b> | <b>0.3686</b> | <b>2.69E-04</b> | <b>30714</b>             | <b>-0.8403</b> | <b>0.1273</b> | <b>4.15E-11</b> | <b>62681</b>             |
|                           |   |           |   |   |      | PP             | -0.1477        | 0.1597        | 3.55E-01        | 31967                    | -1.3663        | 0.4247        | 1.29E-03        | 39423                    | -0.2987        | 0.1495        | 4.57E-02        | 71390                    |
|                           |   |           |   |   |      | HTN            | -0.0756        | 0.026         | 3.58E-03        | 27820.6                  | -0.2519        | 0.0857        | 3.28E-03        | 30714                    | -0.0905        | 0.0249        | 2.77E-04        | 58534.6                  |
|                           |   |           |   |   |      | CPASSOC (SHom) | NA             | NA            | 2.33E-06        | 31970/31967/27820        | NA             | NA            | 1.66E-03        | 30714/30714/30714        | NA             | NA            | 1.42E-07        | 62684/62681/58535        |
|                           |   |           |   |   |      | CPASSOC (SHet) | NA             | NA            | 1.09E-07        | 31970/31967/27820        | NA             | NA            | 2.85E-03        | 30714/30714/30714        | NA             | NA            | 1.69E-08        | 62684/62681/58535        |
| rs114334738               | 9 | 28165671  | t | c | 0.94 | SBP            | 1.6453         | 0.4236        | 1.03E-04        | 31970                    | 3.7745         | 5.6727        | 5.06E-01        | 20901                    | 1.6571         | 0.4224        | 8.75E-05        | 52871                    |
|                           |   |           |   |   |      | DBP            | 1.2762         | 0.2552        | 5.73E-07        | 31967                    | 1.7709         | 3.7499        | 6.37E-01        | 20901                    | 1.2785         | 0.2546        | 5.13E-07        | 52868                    |
|                           |   |           |   |   |      | PP             | 0.3841         | 0.2996        | 2.00E-01        | 31967                    | 2.7247         | 4.3212        | 5.28E-01        | 20901                    | 0.3953         | 0.2989        | 1.86E-01        | 52868                    |
|                           |   |           |   |   |      | HTN            | 0.1069         | 0.0505        | 3.42E-02        | 27225.6                  | -0.2018        | 0.9575        | 8.33E-01        | 21170                    | 0.106          | 0.0504        | 3.55E-02        | 48395.6                  |
|                           |   |           |   |   |      | CPASSOC (SHom) | NA             | NA            | 2.88E-05        | 31970/31967/27225        | NA             | NA            | 8.99E-01        | 20901/20901/21170        | NA             | NA            | 1.22E-03        | 52871/52868/48396        |
|                           |   |           |   |   |      | CPASSOC (SHet) | NA             | NA            | 4.94E-06        | 31970/31967/27225        | NA             | NA            | 7.72E-01        | 20901/20901/21170        | NA             | NA            | 2.01E-04        | 52871/52868/48396        |
| rs71512425                | 9 | 28165694  | a | g | 0.80 | SBP            | 0.8122         | 0.225         | 3.07E-04        | 31970                    | 0.0033         | 0.1894        | 9.86E-01        | 35538                    | 0.3389         | 0.1449        | 1.94E-02        | 67508                    |
|                           |   |           |   |   |      | DBP            | 0.6974         | 0.1348        | 2.32E-07        | 31967                    | -0.0322        | 0.1102        | 7.70E-01        | 38168                    | 0.2599         | 0.0853        | 2.31E-03        | 70135                    |
|                           |   |           |   |   |      | PP             | 0.124          | 0.1605        | 4.40E-01        | 31967                    | -0.0253        | 0.1422        | 8.59E-01        | 35538                    | 0.0403         | 0.1064        | 7.05E-01        | 67505                    |
|                           |   |           |   |   |      | HTN            | 0.0456         | 0.0262        | 8.12E-02        | 27878.6                  | 0.0318         | 0.0252        | 2.06E-01        | 35798                    | 0.0384         | 0.0182        | 3.42E-02        | 63676.6                  |
|                           |   |           |   |   |      | CPASSOC (SHom) | NA             | NA            | 6.47E-05        | 31970/31967/27879        | NA             | NA            | 6.75E-01        | 35538/38168/35798        | NA             | NA            | 1.42E-03        | 67508/70135/63677        |
|                           |   |           |   |   |      | CPASSOC (SHet) | NA             | NA            | 1.99E-06        | 31970/31967/27879        | NA             | NA            | 3.84E-01        | 35538/38168/35798        | NA             | NA            | 3.27E-05        | 67508/70135/63677        |
| rs115795127 <sup>bc</sup> | 9 | 85993901  | t | c | 0.89 | SBP            | 0.9906         | 0.2847        | 5.03E-04        | 31970                    | 8.7717         | 9.0475        | 3.32E-01        | 4473                     | 0.9983         | 0.2846        | 4.51E-04        | 36443                    |
|                           |   |           |   |   |      | DBP            | 0.4763         | 0.1716        | 5.52E-03        | 31967                    | 0.7026         | 6.6522        | 9.16E-01        | 4473                     | 0.4765         | 0.1715        | 5.48E-03        | 36440                    |
|                           |   |           |   |   |      | PP             | 0.5871         | 0.2022        | 3.69E-03        | 31967                    | 9.2572         | 8.6147        | 2.83E-01        | 4473                     | 0.5919         | 0.2021        | 3.41E-03        | 36440                    |
|                           |   |           |   |   |      | HTN            | 0.172          | 0.0325        | 1.23E-07        | 27675.5                  | <b>4.4894</b>  | <b>1.6767</b> | <b>7.42E-03</b> | <b>4473</b>              | <b>0.1736</b>  | <b>0.0325</b> | <b>1.13E-08</b> | <b>32148.5</b>           |
|                           |   |           |   |   |      | CPASSOC (SHom) | NA             | NA            | 5.10E-06        | 31970/31967/27675        | NA             | NA            | 1.07E-01        | 4473/4473/4473           | NA             | NA            | 8.42E-06        | 36443/36440/32149        |
|                           |   |           |   |   |      | CPASSOC (SHet) | NA             | NA            | 1.05E-06        | 31970/31967/27675        | NA             | NA            | <b>8.41E-06</b> | <b>4473/4473/4473</b>    | NA             | NA            | <b>7.30E-09</b> | <b>36443/36440/32149</b> |
| rs190531342               | 9 | 114719568 | t | c | 0.92 | SBP            | -1.5414        | 0.4156        | 2.09E-04        | 30356                    | 3.5014         | 1.4213        | 1.38E-02        | 28014                    | -1.1442        | 0.3989        | 4.13E-03        | 58370                    |
|                           |   |           |   |   |      | DBP            | -1.0192        | 0.2484        | 4.09E-05        | 30353                    | 1.8065         | 0.8716        | 3.82E-02        | 28014                    | -0.807         | 0.2389        | 7.30E-04        | 58367                    |
|                           |   |           |   |   |      | PP             | -0.5053        | 0.2939        | 8.55E-02        | 31967                    | 1.6605         | 1.151         | 1.49E-01        | 28014                    | -0.3727        | 0.2848        | 1.91E-01        | 59981                    |
|                           |   |           |   |   |      | HTN            | -0.2325        | 0.0495        | 2.65E-06        | 25877.2                  | 0.2763         | 0.171         | 1.06E-01        | 28286                    | -0.1932        | 0.0475        | 4.86E-05        | 54163.2                  |
|                           |   |           |   |   |      | CPASSOC (SHom) | NA             | NA            | 9.63E-07        | 30356/30353/25877        | NA             | NA            | 6.07E-02        | 28014/28014/28286        | NA             | NA            | 1.99E-06        | 58370/58367/54163        |
|                           |   |           |   |   |      | CPASSOC (SHet) | NA             | NA            | 5.19E-06        | 30356/30353/25877        | NA             | NA            | 2.10E-01        | 28014/28014/28286        | NA             | NA            | 3.61E-05        | 58370/58367/54163        |
| rs10123054                | 9 | 128452054 | t | c | 0.65 | SBP            | -0.6921        | 0.182         | 1.43E-04        | 31003                    | -0.2167        | 0.1298        | 9.51E-02        | 37754                    | -0.377         | 0.1057        | 3.61E-04        | 68757                    |
|                           |   |           |   |   |      | DBP            | -0.5706        | 0.11          | 2.13E-07        | 31000                    | -0.0705        | 0.0798        | 3.77E-01        | 37754                    | -0.2428        | 0.0646        | 1.70E-04        | 68754                    |
|                           |   |           |   |   |      | PP             | -0.0933        | 0.1302        | 4.74E-01        | 31000                    | -0.159         | 0.0927        | 8.61E-02        | 37754                    | -0.1369        | 0.0755        | 6.97E-02        | 68754                    |
|                           |   |           |   |   |      | HTN            | -0.0667        | 0.021         | 1.48E-03        | 27582.1                  | -0.0131        | 0.0173        | 4.50E-01        | 38026                    | -0.0348        | 0.0134        | 9.22E-03        | 65608.1                  |
|                           |   |           |   |   |      | CPASSOC (SHom) | NA             | NA            | 2.70E-06        | 31003/31000/27582        | NA             | NA            | 3.23E-01        | 37754/37754/38026        | NA             | NA            | 3.42E-05        | 68757/68754/65608        |
|                           |   |           |   |   |      | CPASSOC (SHet) | NA             | NA            | 1.85E-06        | 31003/31000/27582        | NA             | NA            | 6.78E-01        | 37754/37754/38026        | NA             | NA            | 6.89E-05        | 68757/68754/65608        |
| rs28687694                | 9 | 128483092 | t | c | 0.26 | SBP            | 0.8674         | 0.2036        | 2.05E-05        | 28472                    | -0.146         | 0.142         | 3.04E-01        | 37494                    | 0.1856         | 0.1165        | 1.11E-01        | 65966                    |
|                           |   |           |   |   |      | DBP            | 0.5658         | 0.1233        | 4.43E-06        | 28469                    | -0.1233        | 0.0877        | 1.60E-01        | 37494                    | 0.1081         | 0.0715        | 1.30E-01        |                          |



|                            |    |          |   |    |      |                |         |        |          |                   |                |               |                 |                   |                |               |                 |                   |
|----------------------------|----|----------|---|----|------|----------------|---------|--------|----------|-------------------|----------------|---------------|-----------------|-------------------|----------------|---------------|-----------------|-------------------|
| rs10842715                 | 12 | 26487183 | t | g  | 0.46 | PP             | -0.1279 | 0.1228 | 2.98E-01 | 30838             | -0.0402        | 0.0926        | 6.64E-01        | 38701             | -0.072         | 0.0739        | 3.30E-01        | 69539             |
|                            |    |          |   |    |      | HTN            | -0.1026 | 0.0204 | 4.79E-07 | 26649             | -0.0133        | 0.0171        | 4.37E-01        | 38971             | -0.0502        | 0.0131        | 1.29E-04        | 65620             |
|                            |    |          |   |    |      | CPASSOC (SHom) | NA      | NA     | 2.50E-04 | 30841/30838/26649 | NA             | NA            | 7.30E-01        | 38701/38701/38971 | NA             | NA            | 9.63E-03        | 69542/69539/65620 |
|                            |    |          |   |    |      | CPASSOC (SHet) | NA      | NA     | 4.26E-06 | 30841/30838/26649 | NA             | NA            | 4.64E-01        | 38701/38701/38971 | NA             | NA            | 1.81E-04        | 69542/69539/65620 |
| 12:53049050:AC_A           | 12 | 53049050 | a | ac | 0.86 | SBP            | -1.7032 | 0.4322 | 8.11E-05 | 17426             | 0.6576         | 0.2759        | 1.72E-02        | 28247             | -0.0259        | 0.2326        | 9.11E-01        | 45673             |
|                            |    |          |   |    |      | DBP            | -1.1805 | 0.2708 | 1.30E-05 | 17426             | 0.0525         | 0.1626        | 7.47E-01        | 28247             | -0.2741        | 0.1394        | 4.92E-02        | 45673             |
|                            |    |          |   |    |      | PP             | -0.46   | 0.3141 | 1.43E-01 | 15812             | 0.6155         | 0.1932        | 1.45E-03        | 28247             | 0.3202         | 0.1646        | 5.17E-02        | 44059             |
|                            |    |          |   |    |      | HTN            | -0.2433 | 0.0554 | 1.15E-05 | 11700             | -0.0151        | 0.0431        | 7.26E-01        | 19441             | -0.1011        | 0.034         | 2.95E-03        | 31141             |
| rs113866309 <sup>b,c</sup> | 12 | 66516948 | t | c  | 0.98 | CPASSOC (SHom) | NA      | NA     | 7.67E-07 | 17426/17426/11700 | NA             | NA            | 9.72E-01        | 28247/28247/19441 | NA             | NA            | 1.13E-05        | 45673/45673/31141 |
|                            |    |          |   |    |      | CPASSOC (SHet) | NA      | NA     | 5.49E-06 | 17426/17426/11700 | NA             | NA            | 1.21E-01        | 28247/28247/19441 | NA             | NA            | 1.01E-05        | 45673/45673/31141 |
|                            |    |          |   |    |      | SBP            | -3.7312 | 0.8675 | 1.70E-05 | 23760             | -12.0824       | 10.7806       | 2.60E-01        | 10729             | -3.7821        | 0.8633        | 1.24E-05        | 34489             |
|                            |    |          |   |    |      | DBP            | -0.6665 | 0.5167 | 1.97E-01 | 23757             | 8.3116         | 7.3912        | 2.63E-01        | 10729             | -0.2559        | 0.4539        | 2.33E-01        | 34486             |
| rs144058433                | 13 | 73013077 | t | c  | 0.14 | PP             | -3.2809 | 0.6275 | 1.71E-07 | 23757             | <b>-9.7833</b> | <b>3.3063</b> | <b>1.50E-03</b> | <b>9684</b>       | <b>-2.2172</b> | <b>0.5424</b> | <b>8.24E-09</b> | <b>33441</b>      |
|                            |    |          |   |    |      | HTN            | -0.2244 | 0.1033 | 2.99E-02 | 22043             | -3.5217        | 3.3044        | 2.83E-01        | 10729             | -0.1475        | 0.0943        | 2.74E-02        | 32772             |
|                            |    |          |   |    |      | CPASSOC (SHom) | NA      | NA     | 3.91E-03 | 23760/23757/22043 | NA             | NA            | 3.50E-01        | 10729/10729/10729 | NA             | NA            | 1.87E-02        | 34489/34486/32772 |
|                            |    |          |   |    |      | CPASSOC (SHet) | NA      | NA     | 1.40E-04 | 23760/23757/22043 | NA             | NA            | 1.60E-02        | 10729/10729/10729 | NA             | NA            | 4.78E-05        | 34489/34486/32772 |
| rs2414856                  | 15 | 65072461 | a | g  | 0.51 | SBP            | 1.1947  | 0.2826 | 2.37E-05 | 31969.9           | -0.1628        | 0.255         | 5.23E-01        | 36119             | 0.4465         | 0.1893        | 1.84E-02        | 68088.9           |
|                            |    |          |   |    |      | DBP            | 0.8518  | 0.1695 | 5.03E-07 | 31966.9           | 0.023          | 0.1622        | 8.87E-01        | 36119             | 0.4192         | 0.1172        | 3.48E-04        | 68085.9           |
|                            |    |          |   |    |      | PP             | 0.3197  | 0.2002 | 1.10E-01 | 31966.9           | -0.1381        | 0.1718        | 4.21E-01        | 36119             | 0.0561         | 0.1304        | 6.67E-01        | 68085.9           |
|                            |    |          |   |    |      | HTN            | 0.1119  | 0.0327 | 6.29E-04 | 27732.3           | -0.0032        | 0.0337        | 9.24E-01        | 36364             | 0.056          | 0.0235        | 1.69E-02        | 64096.3           |
| rs12445099                 | 16 | 57890233 | a | g  | 0.67 | CPASSOC (SHom) | NA      | NA     | 1.08E-06 | 31969/31966/27732 | NA             | NA            | 5.35E-01        | 36119/36119/36364 | NA             | NA            | 3.00E-05        | 68089/68086/64096 |
|                            |    |          |   |    |      | CPASSOC (SHet) | NA      | NA     | 4.35E-06 | 31969/31966/27732 | NA             | NA            | 9.11E-01        | 36119/36119/36364 | NA             | NA            | 2.55E-04        | 68089/68086/64096 |
|                            |    |          |   |    |      | SBP            | 0.6013  | 0.1944 | 1.98E-03 | 31970             | 0.2477         | 0.2368        | 2.95E-01        | 35367             | 0.4589         | 0.1502        | 2.25E-03        | 67337             |
|                            |    |          |   |    |      | DBP            | 0.2529  | 0.117  | 3.07E-02 | 31967             | 0.0723         | 0.1436        | 6.14E-01        | 35367             | 0.1808         | 0.0907        | 4.62E-02        | 67334             |
| rs12149202                 | 16 | 85700360 | a | g  | 0.11 | PP             | 0.36    | 0.1373 | 8.74E-03 | 31967             | 0.2399         | 0.1813        | 1.86E-01        | 35367             | 0.3162         | 0.1095        | 3.86E-03        | 67334             |
|                            |    |          |   |    |      | HTN            | -0.1193 | 0.023  | 2.16E-07 | 27573.2           | -0.0317        | 0.0303        | 2.94E-01        | 35599             | 0.064          | 0.0183        | 4.74E-04        | 63172.2           |
|                            |    |          |   |    |      | CPASSOC (SHom) | NA      | NA     | 3.40E-05 | 31970/31967/27573 | NA             | NA            | 7.75E-01        | 35367/35367/35599 | NA             | NA            | 1.04E-03        | 67337/67334/63172 |
|                            |    |          |   |    |      | CPASSOC (SHet) | NA      | NA     | 1.86E-06 | 31970/31967/27573 | NA             | NA            | 1.89E-01        | 35367/35367/35599 | NA             | NA            | 1.29E-05        | 67337/67334/63172 |
| rs17721557                 | 17 | 27260017 | t | c  | 0.21 | SBP            | -1.3354 | 0.3011 | 9.21E-06 | 31970             | 0.0767         | 0.1592        | 6.30E-01        | 36873             | -0.2319        | 0.1408        | 9.94E-02        | 68843             |
|                            |    |          |   |    |      | DBP            | -0.6867 | 0.1813 | 1.53E-04 | 31967             | 0.0948         | 0.0976        | 3.32E-01        | 36873             | -0.0809        | 0.086         | 3.47E-01        | 68840             |
|                            |    |          |   |    |      | PP             | -0.7034 | 0.2168 | 1.18E-03 | 31967             | -0.0135        | 0.1142        | 9.06E-01        | 36873             | -0.1633        | 0.101         | 1.06E-01        | 68840             |
|                            |    |          |   |    |      | HTN            | -0.1877 | 0.0345 | 5.14E-08 | 27643.5           | -0.0224        | 0.0205        | 2.73E-01        | 37140             | -0.0655        | 0.0176        | 2.01E-04        | 64783.5           |
| rs17721557                 | 17 | 27260017 | t | c  | 0.21 | CPASSOC (SHom) | NA      | NA     | 9.24E-08 | 31970/31967/27643 | NA             | NA            | 9.99E-01        | 36973/36873/37140 | NA             | NA            | 1.33E-05        | 68843/68840/64784 |
|                            |    |          |   |    |      | CPASSOC (SHet) | NA      | NA     | 2.98E-07 | 31970/31967/27643 | NA             | NA            | 4.49E-01        | 36973/36873/37140 | NA             | NA            | 7.52E-06        | 68843/68840/64784 |
|                            |    |          |   |    |      | SBP            | 1.0488  | 0.2099 | 5.82E-07 | 30086             | 0.0711         | 0.2085        | 7.33E-01        | 37483             | 0.5566         | 0.1479        | 1.68E-04        | 67569             |
|                            |    |          |   |    |      | DBP            | 0.5784  | 0.1266 | 4.87E-06 | 30083             | 0.1056         | 0.1271        | 4.06E-01        | 37483             | 0.343          | 0.0897        | 1.32E-04        | 67566             |
| rs114296860                | 17 | 51285996 | t | c  | 0.02 | PP             | 0.5216  | 0.1497 | 4.93E-04 | 30083             | -0.063         | 0.1532        | 6.81E-01        | 37483             | 0.236          | 0.1071        | 2.75E-02        | 67566             |
|                            |    |          |   |    |      | HTN            | 0.0597  | 0.0245 | 1.47E-02 | 25498.2           | 0.0076         | 0.0273        | 7.81E-01        | 37756             | 0.0365         | 0.0182        | 4.55E-02        | 63254.2           |
|                            |    |          |   |    |      | CPASSOC (SHom) | NA      | NA     | 6.13E-06 | 30086/30083/25498 | NA             | NA            | 6.14E-01        | 37483/37483/37756 | NA             | NA            | 1.66E-04        | 67569/67566/63254 |
|                            |    |          |   |    |      | CPASSOC (SHet) | NA      | NA     | 2.22E-06 | 30086/30083/25498 | NA             | NA            | 5.88E-01        | 37483/37483/37756 | NA             | NA            | 1.24E-04        | 67569/67566/63254 |
| rs2832976                  | 21 | 32037484 | t | c  | 0.16 | SBP            | 2.5521  | 0.6484 | 8.29E-05 | 30321             | -11.985        | 14.626        | 4.13E-01        | 9684              | 2.5236         | 0.6478        | 9.79E-05        | 40005             |
|                            |    |          |   |    |      | DBP            | 1.6074  | 0.3904 | 3.84E-05 | 30318             | -5.247         | 8.863         | 5.54E-01        | 9684              | 1.5941         | 0.39          | 4.37E-05        | 40002             |
|                            |    |          |   |    |      | PP             | 1.1088  | 0.4557 | 1.50E-02 | 30318             | -6.88          | 10.815        | 5.25E-01        | 9684              | 1.0946         | 0.4553        | 1.62E-02        | 40002             |
|                            |    |          |   |    |      | HTN            | -0.042  | 0.0772 | 5.86E-01 | 25456             | -0.676         | 4.305         | 8.75E-01        | 9684              | -0.0422        | 0.0772        | 5.85E-01        | 35140             |
| rs62225706                 | 22 | 26680705 | a | c  | 0.03 | CPASSOC (SHom) | NA      | NA     | 7.16E-03 | 30321/30318/25456 | NA             | NA            | 5.80E-01        | 9684/9684/9684    | NA             | NA            | 2.69E-02        | 40005/40002/35140 |
|                            |    |          |   |    |      | CPASSOC (SHet) | NA      | NA     | 2.65E-07 | 30321/30318/25456 | NA             | NA            | 8.47E-01        | 9684/9684/9684    | NA             | NA            | 3.66E-06        | 40005/40002/35140 |
|                            |    |          |   |    |      | SBP            | -1.1975 | 0.2602 | 4.19E-06 | 31969.9           | -0.0669        | 0.1387        | 6.30E-01        | 39617             | -0.3172        | 0.1224        | 9.58E-03        | 71586.9           |
|                            |    |          |   |    |      | DBP            | -0.3333 | 0.1564 | 3.31E-02 | 31966.9           | -0.0361        | 0.0862        | 6.75E-01        | 37007             | -0.1054        | 0.0755        | 1.63E-01        | 68973.9           |
| rs6006767                  | 22 | 45927045 | t | c  | 0.94 | PP             | -0.9467 | 0.1865 | 3.86E-07 | 31966.9           | 0.038          | 0.0992        | 7.02E-01        | 39617             | -0.179         | 0.0876        | 4.09E-02        | 71583.9           |
|                            |    |          |   |    |      | HTN            | -0.0719 | 0.0302 | 1.72E-02 | 27732.2           | -0.0097        | 0.0179        | 5.89E-01        | 39832             | -0.0259        | 0.0154        | 9.27E-02        | 67564.2           |
|                            |    |          |   |    |      | CPASSOC (SHom) | NA      | NA     | 6.57E-04 | 31969/31969/27732 | NA             | NA            | 5.47E-01        | 39617/37007/39832 | NA             | NA            | 6.97E-03        | 71587/68974/67564 |
|                            |    |          |   |    |      | CPASSOC (SHet) | NA      | NA     | 3.54E-05 | 31969/31969/27732 | NA             | NA            | 8.52E-01        | 39617/37007/39832 | NA             | NA            | 1.29E-03        | 71587/68974/67564 |
| rs6006767                  | 22 | 45927045 | t | c  | 0.94 | SBP            | -3.9669 | 0.8283 | 1.68E-06 | 16221             | -0.0782        | 0.4006        | 8.45E-01        | 26143             | -0.8154        | 0.3607        | 2.38E-02        | 42364             |
|                            |    |          |   |    |      | DBP            | -2.624  | 0.4943 | 1.10E-07 | 15169             | -0.028         | 0.2441        | 9.09E-01        | 26143             | -0.537         | 0.2189        | 1.42E-02        | 41312             |
|                            |    |          |   |    |      | PP             | -1.6075 | 0.6099 | 8.40E-03 | 16218             | 0.1566         | 0.3286        | 6.34E-01        | 26143             | -0.2403        | 0.2893        | 4.06E-01        | 42361             |
|                            |    |          |   |    |      | HTN            | -0.2607 | 0.0964 | 6.85E-03 | 12891             | -0.0344        | 0.0464        | 4.58E-01        | 26387             | -0.077         | 0.0418        | 6.55E-02        | 39278             |
| rs6006767                  | 22 | 45927045 | t | c  | 0.94 | CPASSOC (SHom) | NA      | NA     | 1.17E-06 | 16221/15169/12891 | NA             | NA            | 5.17E-01        | 26143/26143/26387 | NA             | NA            | 3.06E-05        | 42364/41312/39278 |
|                            |    |          |   |    |      | CPASSOC (SHet) | NA      | NA     | 4.62E-07 | 16221/15169/12891 | NA             | NA            | 7.73E-01        | 26143/26143/26387 | NA             | NA            | 2.57E-05        | 42364/41312/39278 |
|                            |    |          |   |    |      | SBP            | -1.0401 | 0.3723 | 5.21E-03 | 31970             | -0.3444        | 0.2025        | 8.90E-02        | 37910             | -0.5033        | 0.1779        | 4.67E-03        | 69880             |
|                            |    |          |   |    |      | DBP            | -1.1597 | 0.2295 | 4.37E-07 | 30918             | -0.2582        | 0.1245        | 3.81E-02        | 38497             | -0.4632        | 0.1094        | 2.31E-05        | 69415             |
| rs6006767                  | 22 | 45927045 | t | c  | 0.94 | PP             | 0.0491  | 0.2651 | 8.53E-01 | 31967             | -0.1627        | 0.1418        | 2.51E-01        | 37910             | -0.1156        | 0.125         | 3.55E-01        | 69877             |
|                            |    |          |   |    |      | HTN            | -0.0763 | 0.0455 | 9.35E-02 | 25742.1           | -0.0151        | 0.0266        | 5.70E-01        | 38183             | -0.0307        | 0.023         | 1.81E-01        | 63925.1           |
|                            |    |          |   |    |      | CPASSOC (SHom) | NA      | NA     | 2.63E-04 | 31970/30918/25742 | NA             | NA            | 2.63E-01        | 37910/38497/38183 | NA             | NA            | 1.36E-03        | 69880/69415/63925 |
|                            |    |          |   |    |      | CPASSOC (SHet) | NA      | NA     | 3.76E-06 | 31970/30918/25742 | NA             | NA            | 2.77E-01        | 37910/38497/38183 | NA             | NA            | 3.79E-05        | 69880/69415/63925 |

N: sample size for CPASSOC refers the sample sizes of SBP/DBP/HTN

<sup>a</sup> Variants identified reaching genome-wide significant threshold of  $5.0 \times 10^{-8}$  in discovery stage and successfully replicated with experimental significance in replication

<sup>b</sup> Variants identified not reaching genome-wide significant threshold of  $5.0 \times 10^{-8}$  in discovery stage but replicated with experimental significance in replication

<sup>c</sup> Novel blood pressure loci identified in current study

Bold statistics are the corresponding significant statistics for significant of identified variants
