# Supplementary material for: Single-trait and multi-trait genome-wide association analyses identify novel loci for blood pressure in African-ancestry populations
Source: PubMed Central journal article supplement (PMC5446189; doi:10.1371/journal.pgen.1006728), 2017-05-12
Supplement: pgen.1006728.s012.pdf [file pgen.1006728.s012.pdf]

**S7 Table. Summary of iHS signals in significant loci with frequency differences across ancestry populations**

| SNP         | Chr | Pos       | Gene         | Derived Allele | Ancestry Allele | Derived Allele Frequency |         |          |       | iHS    |
|-------------|-----|-----------|--------------|----------------|-----------------|--------------------------|---------|----------|-------|--------|
|             |     |           |              |                |                 | African American         | African | European | Asian |        |
| rs78192203  | 8   | 142375073 | <i>GPR20</i> | A              | T               | 0.2                      | 0.21    | 0        | 0     | -2.678 |
| rs7006531   | 8   | 95110744  | <i>CDH17</i> | G              | T               | 0.15                     | 0.19    | 0        | 0     | -1.567 |
| rs113866309 | 12  | 66516948  | <i>LLPH</i>  | C              | T               | 0.02                     | 0.02    | 0        | 0     | -1.776 |
| rs76987554  | 6   | 134080855 | <i>TCF21</i> | T              | C               | 0.09                     | 0.09    | 0        | 0     | -1.723 |
| rs115795127 | 9   | 85993901  | <i>FRMD3</i> | T              | C               | 0.89                     | 0.86    | 1        | 1     | 2.702  |
