# Supplementary material for: Single-trait and multi-trait genome-wide association analyses identify novel loci for blood pressure in African-ancestry populations
Source: PubMed Central journal article supplement (PMC5446189; doi:10.1371/journal.pgen.1006728), 2017-05-12
Supplement: pgen.1006728.s013.pdf [file pgen.1006728.s013.pdf]

S8 Table. MAGENTA analysis

| Rank | Database  | Gene Set                                                                                          | Original number of genes | Effective number of genes | Nominal GSEA P value | FDR   | Trait |
|------|-----------|---------------------------------------------------------------------------------------------------|--------------------------|---------------------------|----------------------|-------|-------|
| 1    | BIOCARTA  | GSK3_PATHWAY                                                                                      | 27                       | 26                        | 0.0012               | 0.163 | SBP   |
| 2    | BIOCARTA  | TH1TH2_PATHWAY                                                                                    | 19                       | 16                        | 0.0016               | 0.157 | DBP   |
| 3    | BIOCARTA  | SHH_PATHWAY                                                                                       | 16                       | 16                        | 0.0021               | 0.156 | SHOM  |
| 4    | BIOCARTA  | CSK_PATHWAY                                                                                       | 24                       | 19                        | 0.0023               | 0.113 | SHOM  |
| 5    | BIOCARTA  | EIF2_PATHWAY                                                                                      | 11                       | 10                        | 0.0039               | 0.116 | SHOM  |
| 6    | BIOCARTA  | CTLA4_PATHWAY                                                                                     | 21                       | 15                        | 0.0043               | 0.228 | DBP   |
| 7    | BIOCARTA  | VIP_PATHWAY                                                                                       | 27                       | 26                        | 0.0044               | 0.137 | SHOM  |
| 8    | BIOCARTA  | MEF2D_PATHWAY                                                                                     | 21                       | 18                        | 0.0051               | 0.279 | HTN   |
| 1    | GOTERM    | dendrite                                                                                          | 111                      | 107                       | 3.00E-05             | 0.233 | SBP   |
| 2    | GOTERM    | regulation of blood pressure                                                                      | 52                       | 46                        | 1.00E-04             | 0.200 | PP    |
| 3    | GOTERM    | filopodium                                                                                        | 25                       | 24                        | 1.00E-04             | 0.226 | PP    |
| 4    | GOTERM    | response to nicotine                                                                              | 12                       | 12                        | 1.00E-04             | 0.273 | SHOM  |
| 5    | GOTERM    | cellular defense response                                                                         | 60                       | 49                        | 3.00E-04             | 0.201 | SHOM  |
| 6    | GOTERM    | nuclear chromosome telomeric region                                                               | 15                       | 15                        | 4.00E-04             | 0.220 | SHOM  |
| 7    | GOTERM    | recycling endosome membrane                                                                       | 18                       | 15                        | 4.00E-04             | 0.216 | SHOM  |
| 8    | GOTERM    | membrane depolarization                                                                           | 16                       | 15                        | 5.00E-04             | 0.163 | PP    |
| 9    | GOTERM    | histone deacetylation                                                                             | 17                       | 15                        | 6.00E-04             | 0.168 | PP    |
| 10   | GOTERM    | high-density lipoprotein particle                                                                 | 19                       | 15                        | 7.00E-04             | 0.195 | SHET  |
| 11   | GOTERM    | lipid transporter activity                                                                        | 19                       | 18                        | 7.00E-04             | 0.104 | SHET  |
| 12   | GOTERM    | membrane fraction                                                                                 | 479                      | 437                       | 9.00E-04             | 0.152 | SHET  |
| 13   | GOTERM    | triglyceride metabolic process                                                                    | 24                       | 23                        | 0.001                | 0.196 | SHET  |
| 14   | GOTERM    | activity                                                                                          | 29                       | 26                        | 0.0013               | 0.224 | PP    |
| 15   | GOTERM    | iron ion binding                                                                                  | 65                       | 58                        | 0.0015               | 0.274 | PP    |
| 16   | GOTERM    | negative regulation of gene-specific transcription from RNA polymerase II promoter                | 43                       | 40                        | 0.0017               | 0.280 | PP    |
| 17   | GOTERM    | actin cytoskeleton organization                                                                   | 119                      | 104                       | 0.0018               | 0.277 | PP    |
| 18   | GOTERM    | promoter binding                                                                                  | 74                       | 68                        | 0.002                | 0.262 | PP    |
| 19   | GOTERM    | phosphate metabolic process                                                                       | 21                       | 21                        | 0.002                | 0.202 | PP    |
| 20   | GOTERM    | myeloid cell differentiation                                                                      | 15                       | 15                        | 0.0023               | 0.259 | PP    |
| 21   | GOTERM    | Rho GTPase activator activity                                                                     | 22                       | 18                        | 0.0037               | 0.293 | PP    |
| 22   | GOTERM    | DNA damage response signal transduction by p53 class mediator resulting in induction of apoptosis | 13                       | 13                        | 0.0051               | 0.270 | PP    |
| 23   | GOTERM    | sarcoplasmic reticulum                                                                            | 21                       | 21                        | 0.0053               | 0.297 | PP    |
| 24   | GOTERM    | transcription repressor binding                                                                   | 12                       | 11                        | 0.0066               | 0.278 | PP    |
| 25   | GOTERM    | polysaccharide binding                                                                            | 11                       | 11                        | 0.007                | 0.280 | PP    |
| 26   | GOTERM    | methylation                                                                                       | 12                       | 11                        | 0.0079               | 0.292 | PP    |
| 27   | GOTERM    | heart development                                                                                 | 123                      | 120                       | 0.0082               | 0.141 | PP    |
| 1    | Panther   | Pyrimidine_Metabolism                                                                             | 6                        | 6                         | 0.004                | 0.137 | DBP   |
| 2    | Panther   | Apoptosis_signaling_pathway                                                                       | 53                       | 47                        | 0.006                | 0.186 | SBP   |
| 3    | Panther   | B_cell_activation                                                                                 | 24                       | 21                        | 0.006                | 0.210 | SBP   |
| 4    | Panther   | T_cell_activation                                                                                 | 31                       | 21                        | 0.0064               | 0.263 | SHOM  |
| 1    | Ingenuity | JAK.Stat.Signaling                                                                                | 10                       | 10                        | 1.00E-04             | 0.011 | DBP   |
| 2    | Ingenuity | T.Cell.Receptor.Signaling                                                                         | 34                       | 33                        | 0.0021               | 0.160 | SHOM  |
| 3    | Ingenuity | B.Cell.Receptor.Signaling                                                                         | 35                       | 33                        | 0.0024               | 0.073 | DBP   |
| 4    | Ingenuity | Aryl.Hydrocarbon.Receptor.Signaling                                                               | 52                       | 50                        | 0.0029               | 0.168 | HTN   |
| 6    | Ingenuity | Integrin.Signaling                                                                                | 38                       | 37                        | 0.0098               | 0.200 | PP    |
| 1    | KEGG      | KEGG_CYTOKINE_CYTOKINE_RECEP<br>TOR_INTERACTION                                                   | 267                      | 192                       | 0.0013               | 0.263 | DBP   |
| 2    | KEGG      | KEGG_VASCULAR_SMOOTH_MUSCLE<br>_CONTRACTION                                                       | 115                      | 104                       | 0.0015               | 0.256 | PP    |
| 3    | KEGG      | KEGG_CARDIAC_MUSCLE_CONTRAC<br>TION                                                               | 80                       | 66                        | 0.0018               | 0.278 | PP    |
| 4    | KEGG      | KEGG_BASAL_CELL_CARCINOMA                                                                         | 55                       | 53                        | 0.0023               | 0.180 | SHOM  |

|    |                            |                                    |     |     |          |           |      |
|----|----------------------------|------------------------------------|-----|-----|----------|-----------|------|
| 6  | KEGG                       | KEGG_STARCH_AND_SUCROSE_METABOLISM | 52  | 37  | 0.0044   | 0.247     | DBP  |
| 7  | KEGG                       | KEGG_GLYCEROLIPID_METABOLISM       | 49  | 43  | 0.0047   | 0.255     | SHET |
| 1  | PANTHER_BIOLOGICAL_PROCESS | Other_neuronal_activity            | 136 | 120 | 0.001    | 0.2364    | HTN  |
| 2  | PANTHER_BIOLOGICAL_PROCESS | T-cell_mediated_immunity           | 138 | 103 | 0.0018   | 0.2359    | PP   |
| 3  | PANTHER_BIOLOGICAL_PROCESS | Tumor_suppressor                   | 102 | 72  | 0.0023   | 0.1611333 | PP   |
| 4  | PANTHER_BIOLOGICAL_PROCESS | DNA_metabolism                     | 32  | 30  | 0.0023   | 0.14215   | HTN  |
| 5  | PANTHER_BIOLOGICAL_PROCESS | Phagocytosis                       | 39  | 36  | 0.0026   | 0.1248    | HTN  |
| 6  | PANTHER_BIOLOGICAL_PROCESS | DNA_repair                         | 169 | 138 | 0.0031   | 0.15365   | HTN  |
| 8  | PANTHER_BIOLOGICAL_PROCESS | Transport                          | 509 | 384 | 0.0042   | 0.18848   | HTN  |
| 9  | PANTHER_BIOLOGICAL_PROCESS | Fatty_acid_beta-oxidation          | 27  | 23  | 0.0044   | 0.2383    | PP   |
| 12 | PANTHER_BIOLOGICAL_PROCESS | Cytokinesis                        | 115 | 82  | 0.0056   | 0.1951833 | HTN  |
| 13 | PANTHER_BIOLOGICAL_PROCESS | Protein_phosphorylation            | 660 | 556 | 0.0082   | 0.247925  | HTN  |
| 1  | PANTHER_MOLECULAR_FUNCTION | Non-motor_actin_binding_protein    | 165 | 136 | 5.00E-04 | 0.150     | SHET |
| 2  | PANTHER_MOLECULAR_FUNCTION | Transcription_cofactor             | 168 | 137 | 0.002    | 0.254     | SHOM |
| 3  | PANTHER_MOLECULAR_FUNCTION | Dehydrogenase                      | 225 | 183 | 0.004    | 0.298     | PP   |
