# Supplementary material for: Single-trait and multi-trait genome-wide association analyses identify novel loci for blood pressure in African-ancestry populations
Source: PubMed Central journal article supplement (PMC5446189; doi:10.1371/journal.pgen.1006728), 2017-05-12
Supplement: pgen.1006728.s014.pdf [file pgen.1006728.s014.pdf]

**S9 Table. eQTL analysis of significant SNPs in tissues**

| SNP        | Proxy     | Correlation R2 | Gene Symbol | P-Value   | Effect Size | Tissue                                    |
|------------|-----------|----------------|-------------|-----------|-------------|-------------------------------------------|
| rs6969780  | rs6969780 | NA             | HOTAIRM1    | 2.50E-14  | 0.54        | Esophagus - Mucosa                        |
| rs6969780  | rs6969780 | NA             | HOXA2       | 8.10E-13  | -0.6        | Artery - Tibial                           |
| rs6969780  | rs6969780 | NA             | HOTAIRM1    | 6.30E-12  | 0.59        | Esophagus - Muscularis                    |
| rs6969780  | rs6969780 | NA             | HOTAIRM1    | 1.80E-10  | 0.33        | Lung                                      |
| rs6969780  | rs6969780 | NA             | HOTAIRM1    | 5.00E-10  | 0.58        | Artery - Tibial                           |
| rs6969780  | rs6969780 | NA             | HOTAIRM1    | 1.30E-09  | 0.64        | Skin - Sun Exposed (Lower leg)            |
| rs6969780  | rs6969780 | NA             | HOXA2       | 1.60E-09  | -0.62       | Nerve - Tibial                            |
| rs6969780  | rs6969780 | NA             | HOTAIRM1    | 5.70E-09  | 0.66        | Cells - Transformed fibroblasts           |
| rs6969780  | rs6969780 | NA             | HOTAIRM1    | 2.90E-08  | 0.48        | Adipose - Subcutaneous                    |
| rs6969780  | rs6969780 | NA             | HOXA2       | 3.10E-07  | -0.49       | Adipose - Subcutaneous                    |
| rs6969780  | rs6969780 | NA             | HOTAIRM1    | 4.70E-07  | 0.46        | Muscle - Skeletal                         |
| rs6969780  | rs6969780 | NA             | HOXA5       | 7.50E-07  | -0.5        | Cells - Transformed fibroblasts           |
| rs6969780  | rs6969780 | NA             | HOTAIRM1    | 0.0000023 | 0.53        | Skin - Not Sun Exposed (Suprapubic)       |
| rs6969780  | rs6969780 | NA             | HOTAIRM1    | 0.0000025 | 0.36        | Stomach                                   |
| rs6969780  | rs6969780 | NA             | HOXA7       | 0.0000032 | -0.4        | Artery - Tibial                           |
| rs7651190  | rs7651190 | NA             | ULK4        | 1.10E-44  | 0.99        | Cells - Transformed fibroblasts           |
| rs7651190  | rs7651190 | NA             | ULK4        | 1.70E-31  | 0.87        | Artery - Aorta                            |
| rs7651190  | rs7651190 | NA             | ULK4        | 1.80E-27  | 0.68        | Whole Blood                               |
| rs7651190  | rs7651190 | NA             | ULK4        | 8.50E-27  | 0.74        | Thyroid                                   |
| rs7651190  | rs7651190 | NA             | ULK4        | 8.20E-25  | 0.67        | Nerve - Tibial                            |
| rs7651190  | rs7651190 | NA             | ULK4        | 5.10E-24  | 0.94        | Esophagus - Mucosa                        |
| rs7651190  | rs7651190 | NA             | ULK4        | 2.40E-21  | 0.62        | Artery - Tibial                           |
| rs7651190  | rs7651190 | NA             | ULK4        | 3.00E-19  | 0.67        | Muscle - Skeletal                         |
| rs7651190  | rs7651190 | NA             | ULK4        | 3.10E-18  | 0.85        | Cells - EBV-transformed lymphocytes       |
| rs7651190  | rs7651190 | NA             | ULK4        | 6.70E-18  | 0.64        | Esophagus - Muscularis                    |
| rs7651190  | rs7651190 | NA             | ULK4        | 2.30E-15  | 0.59        | Skin - Sun Exposed (Lower leg)            |
| rs7651190  | rs7651190 | NA             | ULK4        | 3.80E-15  | 1.2         | Brain - Cortex                            |
| rs7651190  | rs7651190 | NA             | ULK4        | 7.10E-14  | 0.76        | Stomach                                   |
| rs7651190  | rs7651190 | NA             | ULK4        | 1.30E-13  | 0.45        | Adipose - Subcutaneous                    |
| rs7651190  | rs7651190 | NA             | ULK4        | 9.70E-13  | 1.2         | Pituitary                                 |
| rs7651190  | rs7651190 | NA             | ULK4        | 1.10E-12  | 1.2         | Brain - Anterior cingulate cortex (BA24)  |
| rs7651190  | rs7651190 | NA             | ULK4        | 2.30E-12  | 1.1         | Brain - Frontal Cortex (BA9)              |
| rs7651190  | rs7651190 | NA             | ULK4        | 1.10E-11  | 0.88        | Adrenal Gland                             |
| rs7651190  | rs7651190 | NA             | ULK4        | 1.10E-11  | 0.64        | Adipose - Visceral (Omentum)              |
| rs7651190  | rs7651190 | NA             | ULK4        | 1.80E-11  | 0.59        | Colon - Transverse                        |
| rs7651190  | rs7651190 | NA             | ULK4        | 6.50E-11  | 0.44        | Lung                                      |
| rs7651190  | rs7651190 | NA             | ULK4        | 6.90E-11  | 1.1         | Brain - Putamen (basal ganglia)           |
| rs7651190  | rs7651190 | NA             | ULK4        | 1.20E-10  | 0.89        | Brain - Nucleus accumbens (basal ganglia) |
| rs7651190  | rs7651190 | NA             | ULK4        | 1.30E-10  | 0.69        | Pancreas                                  |
| rs7651190  | rs7651190 | NA             | RPL36P20    | 2.30E-09  | 0.55        | Testis                                    |
| rs7651190  | rs7651190 | NA             | ULK4        | 1.20E-08  | 0.71        | Colon - Sigmoid                           |
| rs7651190  | rs7651190 | NA             | ULK4        | 2.20E-08  | 0.8         | Spleen                                    |
| rs7651190  | rs7651190 | NA             | ULK4        | 2.90E-08  | 0.73        | Brain - Caudate (basal ganglia)           |
| rs7651190  | rs7651190 | NA             | ULK4        | 8.60E-08  | 0.63        | Brain - Hypothalamus                      |
| rs7651190  | rs7651190 | NA             | ULK4        | 1.20E-07  | 0.63        | Heart - Left Ventricle                    |
| rs7651190  | rs7651190 | NA             | ULK4        | 1.30E-07  | 0.49        | Skin - Not Sun Exposed (Suprapubic)       |
| rs7651190  | rs7651190 | NA             | ULK4        | 3.70E-07  | 0.55        | Breast - Mammary Tissue                   |
| rs7651190  | rs7651190 | NA             | ULK4        | 4.20E-07  | 0.91        | Brain - Cerebellar Hemisphere             |
| rs7651190  | rs7651190 | NA             | ULK4        | 0.0000014 | 0.79        | Brain - Cerebellum                        |
| rs7651190  | rs7651190 | NA             | ULK4        | 0.0000031 | 0.57        | Artery - Coronary                         |
| rs7651190  | rs7651190 | NA             | ULK4        | 0.0000032 | 0.62        | Esophagus - Gastroesophageal Junction     |
| rs62434120 | rs4869927 | 0.9            | PLEKHG1     | 0.0000068 | -0.27       | Testis                                    |
| rs62434120 | rs9480528 | 0.86           | PLEKHG1     | 0.0000068 | -0.27       | Testis                                    |
