# Supplementary material for: Single-trait and multi-trait genome-wide association analyses identify novel loci for blood pressure in African-ancestry populations
Source: PubMed Central journal article supplement (PMC5446189; doi:10.1371/journal.pgen.1006728), 2017-05-12
Supplement: pgen.1006728.s015.pdf [file pgen.1006728.s015.pdf]

**S10 Table. Primers of candidate genes.**

The primers of candidate genes for real-time polymerase chain reaction (RT-PCR) primers were designed based on the latest mouse genome (GRCm38/mm10) using Primer3 (<http://bioinfo.ut.ee/primer3-0.4.0/>) online. Primers were also designed for isoforms of certain candidate genes.

| Mouse Genes     | Forward Primer         | Reverse Primer         |
|-----------------|------------------------|------------------------|
| <i>Ulk4</i>     | TCTTGAAAGCCTCAAGAACA   | AAAGGATGGTGTGGGATCTG   |
| <i>Eya4</i>     | GCTTTGAGCGAATAATGCAA   | GTGCTTGATGTAGAGCCAAGAG |
| <i>Tcf21</i>    | CTCCAAGCTGGACACTCTCA   | TCACCACTTCCTTCAGGTCA   |
| <i>Evx1</i>     | CTTACCCGGGAGCAGATT     | GCTGACGCTTGTCCCTCAT    |
| <i>Hoxa1-1</i>  | GCAGACCTTTGACTGGATGA   | GCGCTCGTGTAAAGTACTTG   |
| <i>Hoxa1-2</i>  | CCCAGACGGCTACTTACCAG   | GGAGAAGACGTCTCTGAAGCA  |
| <i>Hoxa5</i>    | GCGCAAGCTGCACATTAG     | GGCATGAGCTATTTCGATCC   |
| <i>Hoxa7</i>    | AAGCCAGTTTCCGCATCTAC   | GCTCTTTCTTCCACTTCATGC  |
| <i>Hoxa9</i>    | CCACGCTTGACACTCACACT   | AGCGAGCATGTAGCCAGTT    |
| <i>Hoxa10-1</i> | TCCAGCCCCTTCAGAAAACA   | GCTACGGCTGATCTCTAGGC   |
| <i>Hoxa10-2</i> | TCAAGGCAGTTCCAAAGG     | TCACTTGCTGTCCGTGAGG    |
| <i>Hoxa11</i>   | GTCTTCCGGCCACACTGA     | CAGTTGCAGACGCTTCTCTTT  |
| <i>Igfbp3</i>   | CGCAGAGAAATGGAGGACA    | ACTTGTCACACACCAGCAG    |
| <i>Cdh17</i>    | CCAGTTACTTTCTGCCAGTGTG | CCAGTTACTTTCTGCCAGTGTG |
| <i>Gpr20</i>    | GCGTGGAGAAGAATTCAAGC   | TCCTAGAGCCTTGACCTTGA   |
| <i>Plekhg1</i>  | GTCAGCATAGGCCCAGTCA    | CAGCCATCCTTCTGAGCTTT   |
| <i>Frm3-1</i>   | TCAGACACCAGAGTTTGAGCA  | TCTTGACAACCTGAAGGCCAAT |
| <i>Frm3-2</i>   | AATCCTGACCGGCCATATC    | GGATGTGTCCTCCATGTGC    |
| <i>Llph</i>     | GAGATAGCAACCGTGGTGGT   | TCATCCACACTGGGTACTGG   |
| <i>Tmbim4</i>   | TCTGGTTCTGCAAGCGTTTA   | ACCAGCTCCATCGTCTCACT   |
| <i>Hprt</i>     | CAAACCTTGCTTTCCTGGT    | CAAGGGCATATCCAACAACA   |
